# Supplementary material for: How Hospitals Differentiate Health Information Technology Portfolios for Clinical Care Efficiency: Insights from the HITECH Act
Source: Atypon-hosted journal article supplement (doi:10.1287/isre.2021.0260), 2024-04-22
Supplement: isre.2021.0260.sm1.pdf [file isre.2021.0260.sm1.pdf]

## E-COMPANION

### HOW HOSPITALS DIFFERENTIATE HEALTH INFORMATION TECHNOLOGY PORTFOLIOS FOR CLINICAL CARE EFFICIENCY: INSIGHTS FROM THE HITECH ACT

**Jessica Pye<sup>†</sup>**

W.P. Carey School of Business  
Arizona State University  
Tempe, AZ 85281  
[jessica.pye@asu.edu](mailto:jessica.pye@asu.edu)

**Arun Rai**

Robinson College of Business  
Georgia State University  
Atlanta, GA 30303  
[arunrai@gsu.edu](mailto:arunrai@gsu.edu)

**John Qi Dong**

Nanyang Business School  
Nanyang Technological University  
Singapore 639798  
[john.dong@ntu.edu.sg](mailto:john.dong@ntu.edu.sg)

| Content                                                        | Table             | Figure | Page      |
|----------------------------------------------------------------|-------------------|--------|-----------|
| Measurement items                                              | EC-1              |        | EC.2-3    |
| Endogeneity tests                                              |                   |        |           |
| • GMM model results                                            | EC-2              |        | EC.4      |
| • Results for subsequent search differentiation for HIT        | EC-3              |        | EC.5      |
| Alternative measures for search differentiation for HIT        |                   |        |           |
| • Level of HIT implementations                                 | EC-4              |        | EC.6      |
| • Saidin index with additional items                           | EC-5              |        | EC.7      |
| • Validating with subsequent cost                              | EC-6              |        | EC.8      |
| Alternative measures for cost-based performance shortfalls     |                   |        |           |
| • Cost-based performance shortfalls above and below aspiration | EC-7              |        | EC.9      |
| • 10%, 15%, 20% cost reduction in aspiration                   | EC-8, EC-9, EC-10 |        | EC.10-12  |
| • Social aspiration                                            | EC-11             |        | EC.13     |
| • Normalized measure by number of beds/inpatient days          | EC-12, EC-13      |        | EC.14-15  |
| Sensitivity analysis for reference groups                      |                   |        |           |
| • Nonprofit hospitals as reference group                       | EC-14             | EC-1   | EC.16, 19 |
| • Rural hospitals as reference group                           | EC-15             | EC-2   | EC.17, 19 |
| • Hospitals within the same system as reference group          | EC-16             | EC-3   | EC.18, 19 |
| • Top performers as reference group                            | EC-17             |        | EC.20     |
| Alternative model specifications                               |                   |        |           |
| • Hausman test                                                 | EC-18             |        | EC.21     |
| • Random effects model                                         | EC-19             |        | EC.22     |
| • Clustering standard errors by HSA                            | EC-20             |        | EC.23     |
| • Using single phase baseline                                  | EC-21             |        | EC.24-25  |
| • Using previous phase baseline                                | EC-22             |        | EC.26-27  |

<sup>†</sup> Deceased.

## Measurement Items

**Table EC-1. Measurement Items for Variables**

| Variable                                            | Source                                        | Items                                                                                                                                                                                                                                                                                                                                                                                                                                                                                                                                                                                                                                                                                                                                                                                                                                                                                                                                                                                                                                                                                                                                                                                                                                                                                                                                                                                                                                                                                                                                                                                                                                                                                                                                                                                                                                                                                                                                                                                                                                                                                                                                                                                                                                                                                                                                             |
|-----------------------------------------------------|-----------------------------------------------|---------------------------------------------------------------------------------------------------------------------------------------------------------------------------------------------------------------------------------------------------------------------------------------------------------------------------------------------------------------------------------------------------------------------------------------------------------------------------------------------------------------------------------------------------------------------------------------------------------------------------------------------------------------------------------------------------------------------------------------------------------------------------------------------------------------------------------------------------------------------------------------------------------------------------------------------------------------------------------------------------------------------------------------------------------------------------------------------------------------------------------------------------------------------------------------------------------------------------------------------------------------------------------------------------------------------------------------------------------------------------------------------------------------------------------------------------------------------------------------------------------------------------------------------------------------------------------------------------------------------------------------------------------------------------------------------------------------------------------------------------------------------------------------------------------------------------------------------------------------------------------------------------------------------------------------------------------------------------------------------------------------------------------------------------------------------------------------------------------------------------------------------------------------------------------------------------------------------------------------------------------------------------------------------------------------------------------------------------|
| Search Differentiation for HIT                      | American Hospital Association (AHA) IT survey | <p>Does your hospital currently have a computerized system which allows for:</p> <ul style="list-style-type: none"> <li>• Bar coding – Lab specimens</li> <li>• Bar coding – Pharmacy fracking</li> <li>• Bar coding – Pharmacy administration</li> <li>• Bar coding – Supply chain management</li> <li>• Bar coding – Medication administration</li> <li>• Bar coding – Patient identification</li> <li>• Bar coding – Caregiver verification</li> <li>• Bar coding – Pharmacy verification</li> <li>• Electronic clinical documentation – Patient demographics</li> <li>• Electronic clinical documentation – Physician notes</li> <li>• Electronic clinical documentation – Nursing notes</li> <li>• Electronic clinical documentation – Problem lists</li> <li>• Electronic clinical documentation – Medication lists</li> <li>• Electronic clinical documentation – Discharge summaries</li> <li>• Electronic clinical documentation – Advanced directives (e.g., DNR)</li> <li>• Computerized provider order entry – Laboratory tests</li> <li>• Computerized provider order entry – Radiology tests</li> <li>• Computerized provider order entry – Medications</li> <li>• Computerized provider order entry – Consultation requests</li> <li>• Computerized provider order entry – Nursing orders</li> <li>• Results viewing – Laboratory reports</li> <li>• Results viewing – Radiology reports</li> <li>• Results viewing – Radiology images</li> <li>• Results viewing – Diagnostic test results (e.g., EKG report, Echo report)</li> <li>• Results viewing – Diagnostic test images (e.g., EKG tracing)</li> <li>• Results viewing – Consultant reports</li> <li>• Decision support – Clinical guidelines (e.g., Beta blockers post-MI, ASA in CAD)</li> <li>• Decision support – Clinical reminders (e.g., pneumovax)</li> <li>• Decision support – Drug allergy alerts</li> <li>• Decision support – Drug-drug interaction alerts</li> <li>• Decision support – Drug-lab interaction alerts</li> <li>• Decision support – Drug dosing support</li> <li>• Decision support – Drug formulation check</li> <li>• Other functionalities – Other RFID</li> <li>• Other functionalities – Telehealth/Telemedicine</li> <li>• Other functionalities – Ability to connect mobile devices (e.g., tablet, smart phone, etc.) to EHR</li> </ul> |
| Additional items for Search Differentiation for HIT | AHA IT survey                                 | <p>Which of following patient data does your hospital electronically exchange/share with one or more of the provider types listed below?</p> <ul style="list-style-type: none"> <li>• Patient demographics with hospitals in your system</li> <li>• Patient demographics with hospitals outside of your system</li> <li>• Laboratory results with hospitals in your system</li> <li>• Laboratory results with hospitals outside of your system</li> <li>• Medication history with hospitals in your system</li> <li>• Medication history with hospitals outside of your system</li> <li>• Radiology reports with hospitals in your system</li> <li>• Radiology reports with hospitals outside of your system</li> <li>• Clinical summary care record with hospitals in your system</li> <li>• Clinical summary care record with hospitals outside of your system</li> </ul>                                                                                                                                                                                                                                                                                                                                                                                                                                                                                                                                                                                                                                                                                                                                                                                                                                                                                                                                                                                                                                                                                                                                                                                                                                                                                                                                                                                                                                                                       |

| <b>Variable</b>                   | <b>Source</b>                                                               | <b>Items</b>                                                                                                                                                                                                                                                                        |
|-----------------------------------|-----------------------------------------------------------------------------|-------------------------------------------------------------------------------------------------------------------------------------------------------------------------------------------------------------------------------------------------------------------------------------|
| Cost-Based Performance Shortfalls | AHA annual survey                                                           | Total facility expenses, including: <ul style="list-style-type: none"> <li>• Total facility payroll expenses</li> <li>• Total facility employee benefits</li> <li>• Depreciation expense</li> <li>• Interest expense</li> <li>• Supply expense</li> <li>• Other expenses</li> </ul> |
| Policy Phase                      | Health Information Technology for Economic and Clinical Health (HITECH) Act | Conceptualization phase (2007-2008)<br>Enactment phase (2009-2010)<br>Enforcement phase (2011-2014)                                                                                                                                                                                 |
| Teaching Status                   | AHA annual survey                                                           | Member of Council of Teaching Hospital of the Association of American Medical Colleges (yes vs. no)                                                                                                                                                                                 |
| Nonprofit Status                  | AHA annual survey                                                           | Control code – Type of authority responsible for establishing policy concerning overall operation of the hospitals (nonprofit: 21, 23 vs. for-profit: 31, 32, 33)                                                                                                                   |
| Rural Location                    | AHA annual survey                                                           | Core-based statistical area type (rural vs. metro, micro, division)                                                                                                                                                                                                                 |
| Percent Medicare Days             | AHA annual survey                                                           | Total facility Medicare days<br>Total facility inpatient days                                                                                                                                                                                                                       |
| Case Load                         | AHA annual survey                                                           | Total facility admissions<br>Full time total personnel                                                                                                                                                                                                                              |
| Capital Expense                   | AHA annual survey                                                           | Total capital expenditures                                                                                                                                                                                                                                                          |
| Hospital Size                     | AHA annual survey                                                           | General medical and surgical (adult) beds                                                                                                                                                                                                                                           |
| Physician Staffing                | AHA annual survey                                                           | Full time physicians and dentists                                                                                                                                                                                                                                                   |
| Research Focus                    | AHA annual survey                                                           | Health research – hospital (yes vs. no)                                                                                                                                                                                                                                             |
| Number of Hospitals in System     | AHA annual survey                                                           | Health care system ID (counting hospitals for each ID)                                                                                                                                                                                                                              |
| Physician Ownership Status        | AHA annual survey                                                           | Is hospital owned in whole or in part by physicians or a physicians group?                                                                                                                                                                                                          |
| HMO                               | AHA annual survey                                                           | Does the hospital have a formal written contract with an HMO?                                                                                                                                                                                                                       |
| PPO                               | AHA annual survey                                                           | Does the hospital have a formal written contract with a PPO?                                                                                                                                                                                                                        |
| Change in Leadership              | AHA annual survey                                                           | Name of chief administrator (change over time)                                                                                                                                                                                                                                      |
| Financial Slack                   | Centers for Medicare and Medicaid Services (CMS) report                     | Cash on hand and in banks<br>Total current liabilities                                                                                                                                                                                                                              |
| Fixed Assets                      | CMS report                                                                  | Total fixed assets                                                                                                                                                                                                                                                                  |
| Net Patient Revenue               | CMS report                                                                  | Net patient revenues                                                                                                                                                                                                                                                                |

## Endogeneity Tests

**Table EC-2. System GMM Model Results**

| <b>Search Differentiation for HIT</b> | <b>A</b>             | <b>B</b>              | <b>C</b>            | <b>D</b>             |
|---------------------------------------|----------------------|-----------------------|---------------------|----------------------|
| Cost-Based Performance Shortfalls     | 0.145**<br>(0.062)   | 0.377***<br>(0.110)   | 0.522***<br>(0.080) | -0.347***<br>(0.048) |
| Teaching Status                       | -0.119<br>(0.184)    | -0.061<br>(0.277)     | -0.075<br>(0.117)   | -0.151<br>(0.137)    |
| Nonprofit Status                      | 0.646***<br>(0.145)  | 0.266<br>(0.282)      | 0.856***<br>(0.119) | 0.779***<br>(0.119)  |
| Rural Location                        | 0.188<br>(0.129)     | 0.358<br>(0.264)      | 0.110<br>(0.102)    | 0.283**<br>(0.110)   |
| Percent Medicare Days                 | -0.604***<br>(0.207) | -0.730*<br>(0.383)    | -0.378**<br>(0.169) | -0.232<br>(0.187)    |
| Case Load                             | 0.022**<br>(0.011)   | 0.005<br>(0.018)      | -0.009<br>(0.008)   | -0.001<br>(0.009)    |
| Financial Slack                       | 0.034<br>(0.107)     | 0.406<br>(0.428)      | 0.059<br>(0.076)    | 0.088<br>(0.094)     |
| Capital Expenses (log)                | 0.133***<br>(0.035)  | 0.134**<br>(0.066)    | 0.127***<br>(0.027) | 0.189***<br>(0.031)  |
| Fixed Assets (log)                    | 0.116**<br>(0.051)   | 0.908***<br>(0.112)   | 0.080**<br>(0.039)  | 0.171***<br>(0.042)  |
| Net Patient Revenue (log)             | 0.122<br>(0.087)     | 0.826***<br>(0.183)   | 0.080<br>(0.072)    | 0.214***<br>(0.079)  |
| Hospital Size (log)                   | 0.286***<br>(0.043)  | 0.203***<br>(0.068)   | 0.278***<br>(0.033) | 0.247***<br>(0.036)  |
| Physician Staffing (log)              | -0.016<br>(0.026)    | 0.045<br>(0.047)      | -0.008<br>(0.018)   | 0.010<br>(0.021)     |
| Research Focus                        | -0.216**<br>(0.110)  | 0.027<br>(0.188)      | -0.092<br>(0.078)   | 0.011<br>(0.084)     |
| Number of Hospitals in System (log)   | 0.011<br>(0.027)     | 0.101**<br>(0.049)    | 0.047**<br>(0.021)  | 0.086***<br>(0.022)  |
| Physician Ownership Status            | -0.640***<br>(0.171) | -1.182**<br>(0.476)   | -0.072<br>(0.116)   | -0.187<br>(0.154)    |
| HMO                                   | 0.200<br>(0.134)     | 0.750***<br>(0.226)   | -0.079<br>(0.101)   | 0.165<br>(0.108)     |
| PPO                                   | -0.044<br>(0.160)    | -0.492*<br>(0.263)    | 0.196<br>(0.119)    | 0.011<br>(0.128)     |
| Change in Leadership                  | 0.217**<br>(0.093)   | -0.106<br>(0.169)     | 0.063<br>(0.071)    | 0.068<br>(0.084)     |
| Constant                              | -1.011<br>(0.726)    | -11.891***<br>(1.477) | 0.598<br>(0.625)    | -2.953***<br>(0.626) |
| R <sup>2</sup>                        | 0.104                | 0.257                 | 0.340               | 0.406                |
| Number of Hospital-Year Observations  | 6,039                | 2,280                 | 4,693               | 5,105                |

*Notes:* \*  $p < 0.1$ ; \*\*  $p < 0.05$ ; \*\*\*  $p < 0.01$ . Robust standard errors in parentheses. One-year lags of the regressors and the control variables are used as instruments.

**Table EC-3. Results for Search Differentiation for HIT in the Subsequent Year**

| Search Differentiation for HIT in the Subsequent Year       | A                    | B                    | C                    | D                    |
|-------------------------------------------------------------|----------------------|----------------------|----------------------|----------------------|
| Cost-Based Performance Shortfalls                           | 0.367***<br>(0.124)  | 0.166<br>(0.135)     | -0.084<br>(0.127)    | 0.662***<br>(0.130)  |
| Conceptualization Phase                                     |                      | 3.301***<br>(0.163)  |                      |                      |
| Enactment Phase                                             |                      |                      | 2.745***<br>(0.148)  |                      |
| Enforcement Phase                                           |                      |                      |                      | -2.745***<br>(0.148) |
| Cost-Based Performance Shortfalls × Conceptualization Phase |                      | 0.422***<br>(0.062)  |                      |                      |
| Cost-Based Performance Shortfalls × Enactment Phase         |                      |                      | 0.746***<br>(0.053)  |                      |
| Cost-Based Performance Shortfalls × Enforcement Phase       |                      |                      |                      | -0.746***<br>(0.053) |
| Teaching Status                                             | -1.219***<br>(0.378) | -0.900**<br>(0.458)  | -0.745**<br>(0.335)  | -0.745**<br>(0.335)  |
| Nonprofit Status                                            | 0.200<br>(0.550)     | 0.271<br>(0.467)     | 0.172<br>(0.507)     | 0.172<br>(0.507)     |
| Rural Location                                              | -0.313<br>(0.391)    | -0.490<br>(0.357)    | -0.344<br>(0.385)    | -0.344<br>(0.385)    |
| Percent Medicare Days                                       | -0.084<br>(0.397)    | 0.102<br>(0.373)     | -0.129<br>(0.379)    | -0.129<br>(0.379)    |
| Case Load                                                   | 0.014<br>(0.019)     | -0.011<br>(0.015)    | 0.026<br>(0.019)     | 0.026<br>(0.019)     |
| Financial Slack                                             | -0.077<br>(0.076)    | 0.055<br>(0.087)     | -0.067<br>(0.068)    | -0.067<br>(0.068)    |
| Capital Expenses (log)                                      | 0.043<br>(0.031)     | 0.038<br>(0.029)     | 0.029<br>(0.030)     | 0.029<br>(0.030)     |
| Fixed Assets (log)                                          | 0.179**<br>(0.079)   | 0.166**<br>(0.081)   | 0.223***<br>(0.075)  | 0.223***<br>(0.075)  |
| Net Patient Revenue (log)                                   | -0.354**<br>(0.169)  | -0.127<br>(0.171)    | -0.149<br>(0.160)    | -0.149<br>(0.160)    |
| Hospital Size (log)                                         | -0.464***<br>(0.125) | -0.462***<br>(0.124) | -0.350***<br>(0.114) | -0.350***<br>(0.114) |
| Physician Staffing (log)                                    | 0.018<br>(0.043)     | -0.013<br>(0.042)    | 0.010<br>(0.039)     | 0.010<br>(0.039)     |
| Research Focus                                              | -0.375**<br>(0.159)  | -0.506***<br>(0.148) | -0.216<br>(0.158)    | -0.216<br>(0.158)    |
| Number of Hospitals in System (log)                         | -0.099*<br>(0.057)   | -0.067<br>(0.053)    | -0.083<br>(0.056)    | -0.083<br>(0.056)    |
| Physician Ownership Status                                  | -0.156<br>(0.219)    | -0.301<br>(0.246)    | -0.215<br>(0.207)    | -0.215<br>(0.207)    |
| HMO                                                         | 0.008<br>(0.179)     | 0.019<br>(0.172)     | 0.008<br>(0.173)     | 0.008<br>(0.173)     |
| PPO                                                         | 0.113<br>(0.205)     | -0.037<br>(0.194)    | 0.098<br>(0.196)     | 0.098<br>(0.196)     |
| Change in Leadership                                        | 0.065<br>(0.067)     | 0.052<br>(0.065)     | 0.048<br>(0.066)     | 0.048<br>(0.066)     |
| Constant                                                    | 11.985***<br>(3.288) | 4.228<br>(3.307)     | 3.321<br>(3.121)     | 6.066*<br>(3.116)    |
| Year Dummies                                                | Yes                  | Yes                  | Yes                  | Yes                  |
| R <sup>2</sup>                                              | 0.451                | 0.405                | 0.481                | 0.481                |
| Number of Hospitals                                         | 3,123                | 3,319                | 3,123                | 3,123                |
| Number of Hospital-Year Observations                        | 9,438                | 11,316               | 9,438                | 9,438                |

Notes: \*  $p < 0.1$ ; \*\*  $p < 0.05$ ; \*\*\*  $p < 0.01$ . Robust standard errors in parentheses.

**Alternative Measures for Search Differentiation for HIT**

**Table EC-4. Results for Level of HIT Implementations**

| <b>Level of HIT Implementations</b>                         | <b>A</b>             | <b>B</b>             | <b>C</b>             | <b>D</b>             |
|-------------------------------------------------------------|----------------------|----------------------|----------------------|----------------------|
| Cost-Based Performance Shortfalls                           | 0.028*<br>(0.015)    | 0.010<br>(0.015)     | 0.019<br>(0.015)     | 0.066***<br>(0.015)  |
| Conceptualization Phase                                     |                      | -0.468***<br>(0.020) |                      |                      |
| Enactment Phase                                             |                      |                      | -0.058***<br>(0.020) |                      |
| Enforcement Phase                                           |                      |                      |                      | 0.517***<br>(0.017)  |
| Cost-Based Performance Shortfalls × Conceptualization Phase |                      | 0.052***<br>(0.006)  |                      |                      |
| Cost-Based Performance Shortfalls × Enactment Phase         |                      |                      | 0.060***<br>(0.005)  |                      |
| Cost-Based Performance Shortfalls × Enforcement Phase       |                      |                      |                      | -0.074***<br>(0.005) |
| Teaching Status                                             | -0.126***<br>(0.040) | -0.116***<br>(0.040) | -0.111***<br>(0.040) | -0.093**<br>(0.040)  |
| Nonprofit Status                                            | 0.267***<br>(0.048)  | 0.271***<br>(0.048)  | 0.266***<br>(0.048)  | 0.270***<br>(0.047)  |
| Rural Location                                              | -0.364***<br>(0.057) | -0.344***<br>(0.057) | -0.351***<br>(0.057) | -0.320***<br>(0.057) |
| Percent Medicare Days                                       | 0.043<br>(0.050)     | 0.038<br>(0.050)     | 0.042<br>(0.050)     | 0.034<br>(0.050)     |
| Case Load                                                   | 0.001<br>(0.002)     | 0.001<br>(0.002)     | 0.001<br>(0.002)     | 0.002<br>(0.002)     |
| Financial Slack                                             | -0.006<br>(0.018)    | -0.007<br>(0.018)    | -0.005<br>(0.018)    | -0.005<br>(0.018)    |
| Capital Expenses (log)                                      | 0.008**<br>(0.004)   | 0.008**<br>(0.004)   | 0.007*<br>(0.004)    | 0.006*<br>(0.004)    |
| Fixed Assets (log)                                          | 0.079***<br>(0.010)  | 0.081***<br>(0.010)  | 0.080***<br>(0.010)  | 0.083***<br>(0.010)  |
| Net Patient Revenue (log)                                   | 0.306***<br>(0.021)  | 0.318***<br>(0.021)  | 0.308***<br>(0.021)  | 0.325***<br>(0.021)  |
| Hospital Size (log)                                         | 0.096***<br>(0.016)  | 0.097***<br>(0.016)  | 0.097***<br>(0.016)  | 0.100***<br>(0.016)  |
| Physician Staffing (log)                                    | 0.005<br>(0.004)     | 0.005<br>(0.004)     | 0.004<br>(0.004)     | 0.004<br>(0.004)     |
| Research Focus                                              | -0.011<br>(0.016)    | -0.007<br>(0.016)    | -0.008<br>(0.016)    | 0.000<br>(0.016)     |
| Number of Hospitals in System (log)                         | -0.002<br>(0.007)    | -0.001<br>(0.006)    | -0.002<br>(0.006)    | -0.001<br>(0.006)    |
| Physician Ownership Status                                  | -0.095**<br>(0.039)  | -0.100**<br>(0.039)  | -0.097**<br>(0.038)  | -0.105***<br>(0.038) |
| HMO                                                         | 0.022<br>(0.021)     | 0.020<br>(0.021)     | 0.022<br>(0.021)     | 0.020<br>(0.020)     |
| PPO                                                         | -0.004<br>(0.023)    | -0.004<br>(0.023)    | -0.005<br>(0.023)    | -0.005<br>(0.023)    |
| Change in Leadership                                        | 0.002<br>(0.009)     | 0.003<br>(0.009)     | 0.001<br>(0.009)     | 0.002<br>(0.009)     |
| Constant                                                    | -4.508***<br>(0.365) | -4.375***<br>(0.371) | -4.506***<br>(0.364) | -4.986***<br>(0.364) |
| Year Dummies                                                | Yes                  | Yes                  | Yes                  | Yes                  |
| Wald Chi-square                                             | 4134.53              | 4141.23              | 4185.32              | 4219.04              |
| Number of Hospitals                                         | 2,641                | 2,641                | 2,641                | 2,641                |
| Number of Hospital-Year Observations                        | 10,615               | 10,615               | 10,615               | 10,615               |

Notes: \*  $p < 0.1$ ; \*\*  $p < 0.05$ ; \*\*\*  $p < 0.01$ . Standard errors in parentheses.

**Table EC-5. Results for Search Differentiation for HIT with Additional Items**

| Search Differentiation for HIT with Additional Items        | A                    | B                    | C                    | D                    |
|-------------------------------------------------------------|----------------------|----------------------|----------------------|----------------------|
| Cost-Based Performance Shortfalls                           | 0.504***<br>(0.152)  | 0.354**<br>(0.154)   | 0.386**<br>(0.152)   | 0.701***<br>(0.153)  |
| Conceptualization Phase                                     |                      | 2.135***<br>(0.186)  |                      |                      |
| Enactment Phase                                             |                      |                      | -1.047***<br>(0.192) |                      |
| Enforcement Phase                                           |                      |                      |                      | -1.611***<br>(0.169) |
| Cost-Based Performance Shortfalls × Conceptualization Phase |                      | 0.328***<br>(0.074)  |                      |                      |
| Cost-Based Performance Shortfalls × Enactment Phase         |                      |                      | 0.525***<br>(0.058)  |                      |
| Cost-Based Performance Shortfalls × Enforcement Phase       |                      |                      |                      | -0.624***<br>(0.061) |
| Teaching Status                                             | -0.703<br>(0.489)    | -0.589<br>(0.482)    | -0.483<br>(0.478)    | -0.225<br>(0.473)    |
| Nonprofit Status                                            | 0.545<br>(0.570)     | 0.543<br>(0.569)     | 0.536<br>(0.564)     | 0.532<br>(0.563)     |
| Rural Location                                              | -0.658<br>(0.532)    | -0.648<br>(0.531)    | -0.673<br>(0.531)    | -0.658<br>(0.529)    |
| Percent Medicare Days                                       | 0.133<br>(0.427)     | 0.102<br>(0.426)     | 0.111<br>(0.422)     | 0.049<br>(0.421)     |
| Case Load                                                   | -0.019<br>(0.019)    | -0.017<br>(0.018)    | -0.015<br>(0.019)    | -0.012<br>(0.018)    |
| Financial Slack                                             | 0.027<br>(0.093)     | 0.022<br>(0.091)     | 0.031<br>(0.101)     | 0.024<br>(0.098)     |
| Capital Expenses (log)                                      | 0.067*<br>(0.034)    | 0.065*<br>(0.034)    | 0.060*<br>(0.034)    | 0.055*<br>(0.034)    |
| Fixed Assets (log)                                          | 0.144<br>(0.097)     | 0.153<br>(0.097)     | 0.164*<br>(0.095)    | 0.186**<br>(0.095)   |
| Net Patient Revenue (log)                                   | -0.197<br>(0.210)    | -0.104<br>(0.210)    | -0.134<br>(0.207)    | 0.054<br>(0.209)     |
| Hospital Size (log)                                         | -0.480***<br>(0.152) | -0.453***<br>(0.153) | -0.440***<br>(0.150) | -0.382**<br>(0.153)  |
| Physician Staffing (log)                                    | -0.123***<br>(0.046) | -0.122***<br>(0.045) | -0.128***<br>(0.044) | -0.128***<br>(0.043) |
| Research Focus                                              | -0.467***<br>(0.168) | -0.429**<br>(0.167)  | -0.419**<br>(0.167)  | -0.337**<br>(0.167)  |
| Number of Hospitals in System (log)                         | -0.054<br>(0.065)    | -0.047<br>(0.065)    | -0.051<br>(0.064)    | -0.037<br>(0.064)    |
| Physician Ownership Status                                  | -0.197<br>(0.286)    | -0.234<br>(0.285)    | -0.216<br>(0.284)    | -0.291<br>(0.282)    |
| HMO                                                         | 0.216<br>(0.204)     | 0.208<br>(0.202)     | 0.221<br>(0.202)     | 0.206<br>(0.201)     |
| PPO                                                         | -0.055<br>(0.221)    | -0.058<br>(0.220)    | -0.070<br>(0.219)    | -0.079<br>(0.217)    |
| Change in Leadership                                        | 0.029<br>(0.080)     | 0.032<br>(0.079)     | 0.020<br>(0.079)     | 0.023<br>(0.078)     |
| Constant                                                    | 9.450**<br>(3.937)   | 4.908<br>(3.978)     | 7.916**<br>(3.888)   | 3.055<br>(3.938)     |
| Year Dummies                                                | Yes                  | Yes                  | Yes                  | Yes                  |
| R <sup>2</sup>                                              | 0.192                | 0.195                | 0.203                | 0.211                |
| Number of Hospitals                                         | 3,321                | 3,321                | 3,321                | 3,321                |
| Number of Hospital-Year Observations                        | 11,329               | 11,329               | 11,329               | 11,329               |

Notes: \*  $p < 0.1$ ; \*\*  $p < 0.05$ ; \*\*\*  $p < 0.01$ . Standard errors in parentheses. The Saidin index is computed based on the list of 36 items included in the original Saidin index for the main analysis plus 10 additional items for electronic exchange inside/outside of system.

**Table EC-6. Results for Cost in the Subsequent Years**

| Cost in Subsequent Years             | A                    | B                    |
|--------------------------------------|----------------------|----------------------|
|                                      | One Year After       | Two Years After      |
| Search Differentiation for HIT       | -0.005***<br>(0.001) | -0.001**<br>(0.001)  |
| Teaching Status                      | -0.019<br>(0.017)    | -0.033*<br>(0.018)   |
| Nonprofit Status                     | 0.010<br>(0.042)     | -0.053*<br>(0.030)   |
| Percent Medicare Days                | 0.064***<br>(0.021)  | 0.053**<br>(0.021)   |
| Case Load                            | -0.007***<br>(0.001) | -0.006***<br>(0.002) |
| Financial Slack                      | -0.000<br>(0.005)    | 0.006<br>(0.004)     |
| Capital Expenses (log)               | 0.002<br>(0.002)     | 0.001<br>(0.002)     |
| Fixed Assets (log)                   | 0.060***<br>(0.008)  | 0.054***<br>(0.009)  |
| Net Patient Revenue (log)            | 0.277***<br>(0.021)  | 0.221***<br>(0.021)  |
| Hospital Size (log)                  | 0.013<br>(0.009)     | -0.000<br>(0.010)    |
| Physician Staffing (log)             | 0.009***<br>(0.002)  | 0.007***<br>(0.003)  |
| Research Focus                       | 0.025***<br>(0.008)  | 0.030***<br>(0.009)  |
| Number of Hospitals in System (log)  | 0.007*<br>(0.004)    | 0.012***<br>(0.005)  |
| Physician Ownership Status           | 0.039**<br>(0.019)   | 0.017<br>(0.037)     |
| HMO                                  | -0.001<br>(0.011)    | -0.000<br>(0.010)    |
| PPO                                  | -0.004<br>(0.011)    | -0.006<br>(0.011)    |
| Change in Leadership                 | 0.004<br>(0.004)     | 0.005<br>(0.004)     |
| Constant                             | 12.099***<br>(0.391) | 13.367***<br>(0.397) |
| R <sup>2</sup>                       | 0.261                | 0.155                |
| Number of Hospitals                  | 3,174                | 2,941                |
| Number of Hospital-Year Observations | 9,292                | 7,330                |

Notes: \*  $p < 0.1$ ; \*\*  $p < 0.05$ ; \*\*\*  $p < 0.01$ . Robust standard errors in parentheses.

## Alternative Measures for Cost-Based Performance Shortfalls

**Table EC-7. Results Using Separate Cost-Based Performance Shortfalls**

| Search Differentiation for HIT                                                 | A                    | B                    | C                    | D                    |
|--------------------------------------------------------------------------------|----------------------|----------------------|----------------------|----------------------|
| Cost-Based Performance Shortfalls (Above Aspiration)                           | 0.373***<br>(0.137)  | 0.178<br>(0.137)     | 0.239*<br>(0.136)    | 0.579***<br>(0.139)  |
| Cost-Based Performance Shortfalls (Below Aspiration)                           | 0.541**<br>(0.215)   | 0.206<br>(0.213)     | 0.578***<br>(0.216)  | 0.403<br>(0.335)     |
| Conceptualization Phase                                                        |                      | 3.259***<br>(0.166)  |                      |                      |
| Enactment Phase                                                                |                      |                      | -1.467***<br>(0.166) |                      |
| Enforcement Phase                                                              |                      |                      |                      | -2.769***<br>(0.149) |
| Cost-Based Performance Shortfalls (Above Aspiration) × Conceptualization Phase |                      | 0.431***<br>(0.063)  |                      |                      |
| Cost-Based Performance Shortfalls (Below Aspiration) × Conceptualization Phase |                      | 1.269*<br>(0.664)    |                      |                      |
| Cost-Based Performance Shortfalls (Above Aspiration) × Enactment Phase         |                      |                      | 0.578***<br>(0.050)  |                      |
| Cost-Based Performance Shortfalls (Below Aspiration) × Enactment Phase         |                      |                      | -0.177<br>(0.337)    |                      |
| Cost-Based Performance Shortfalls (Above Aspiration) × Enforcement Phase       |                      |                      |                      | -0.733***<br>(0.051) |
| Cost-Based Performance Shortfalls (Below Aspiration) × Enforcement Phase       |                      |                      |                      | -0.439<br>(0.314)    |
| Teaching Status                                                                | -1.045**<br>(0.481)  | -0.897*<br>(0.458)   | -0.794*<br>(0.464)   | -0.481<br>(0.434)    |
| Nonprofit Status                                                               | 0.273<br>(0.469)     | 0.269<br>(0.467)     | 0.255<br>(0.460)     | 0.258<br>(0.456)     |
| Rural Location                                                                 | -0.509<br>(0.358)    | -0.493<br>(0.356)    | -0.524<br>(0.352)    | -0.503<br>(0.351)    |
| Percent Medicare Days                                                          | 0.134<br>(0.375)     | 0.114<br>(0.373)     | 0.099<br>(0.367)     | 0.032<br>(0.363)     |
| Case Load                                                                      | -0.013<br>(0.015)    | -0.010<br>(0.015)    | -0.008<br>(0.015)    | -0.005<br>(0.015)    |
| Financial Slack                                                                | 0.060<br>(0.092)     | 0.052<br>(0.087)     | 0.070<br>(0.099)     | 0.062<br>(0.094)     |
| Capital Expenses (log)                                                         | 0.041<br>(0.030)     | 0.039<br>(0.029)     | 0.033<br>(0.029)     | 0.026<br>(0.028)     |
| Fixed Assets (log)                                                             | 0.153*<br>(0.082)    | 0.167**<br>(0.081)   | 0.177**<br>(0.080)   | 0.204***<br>(0.079)  |
| Net Patient Revenue (log)                                                      | -0.240<br>(0.174)    | -0.136<br>(0.172)    | -0.161<br>(0.169)    | 0.064<br>(0.166)     |
| Hospital Size (log)                                                            | -0.499***<br>(0.124) | -0.470***<br>(0.125) | -0.450***<br>(0.120) | -0.376***<br>(0.121) |
| Physician Staffing (log)                                                       | -0.013<br>(0.043)    | -0.012<br>(0.042)    | -0.018<br>(0.040)    | -0.020<br>(0.037)    |
| Research Focus                                                                 | -0.555***<br>(0.150) | -0.502***<br>(0.148) | -0.493***<br>(0.149) | -0.400***<br>(0.147) |
| Number of Hospitals in System (log)                                            | -0.077<br>(0.053)    | -0.070<br>(0.053)    | -0.073<br>(0.053)    | -0.056<br>(0.053)    |
| Physician Ownership Status                                                     | -0.262<br>(0.249)    | -0.301<br>(0.246)    | -0.283<br>(0.242)    | -0.369<br>(0.238)    |
| HMO                                                                            | 0.030<br>(0.174)     | 0.017<br>(0.172)     | 0.033<br>(0.171)     | 0.016<br>(0.168)     |
| PPO                                                                            | -0.037<br>(0.197)    | -0.042<br>(0.194)    | -0.061<br>(0.193)    | -0.064<br>(0.189)    |
| Change in Leadership                                                           | 0.049<br>(0.066)     | 0.053<br>(0.065)     | 0.037<br>(0.065)     | 0.041<br>(0.064)     |
| Constant                                                                       | 10.499***<br>(3.347) | 4.365<br>(3.323)     | 8.593***<br>(3.237)  | 2.834<br>(3.195)     |
| Year Dummies                                                                   | Yes                  | Yes                  | Yes                  | Yes                  |
| R <sup>2</sup>                                                                 | 0.399                | 0.405                | 0.415                | 0.428                |
| Number of Hospitals                                                            | 3,319                | 3,319                | 3,319                | 3,319                |
| Number of Hospital-Year Observations                                           | 11,316               | 11,316               | 11,316               | 11,316               |

Notes: \*  $p < 0.1$ ; \*\*  $p < 0.05$ ; \*\*\*  $p < 0.01$ . Robust standard errors in parentheses. Cost-based performance shortfalls is separated into two variables when cost is above and below aspiration level.

**Table EC-8. Results Using 10% Cost Reduction to Compute Aspiration Level**

| Search Differentiation for HIT                                 | A                    | B                    | C                    | D                    |
|----------------------------------------------------------------|----------------------|----------------------|----------------------|----------------------|
| Cost-Based Performance Shortfalls                              | 0.337**<br>(0.132)   | 0.151<br>(0.132)     | 0.201<br>(0.131)     | 0.590***<br>(0.133)  |
| Conceptualization Phase                                        |                      | 3.284***<br>(0.166)  |                      |                      |
| Enactment Phase                                                |                      |                      | -1.572***<br>(0.165) |                      |
| Enforcement Phase                                              |                      |                      |                      | -2.700***<br>(0.149) |
| Cost-Based Performance Shortfalls ×<br>Conceptualization Phase |                      | 0.426***<br>(0.063)  |                      |                      |
| Cost-Based Performance Shortfalls ×<br>Enactment Phase         |                      |                      | 0.607***<br>(0.050)  |                      |
| Cost-Based Performance Shortfalls ×<br>Enforcement Phase       |                      |                      |                      | -0.749***<br>(0.051) |
| Teaching Status                                                | -1.047**<br>(0.481)  | -0.901**<br>(0.459)  | -0.797*<br>(0.465)   | -0.482<br>(0.434)    |
| Nonprofit Status                                               | 0.277<br>(0.471)     | 0.273<br>(0.468)     | 0.267<br>(0.460)     | 0.259<br>(0.456)     |
| Rural Location                                                 | -0.502<br>(0.359)    | -0.490<br>(0.357)    | -0.519<br>(0.355)    | -0.502<br>(0.352)    |
| Percent Medicare Days                                          | 0.143<br>(0.375)     | 0.106<br>(0.373)     | 0.118<br>(0.367)     | 0.047<br>(0.363)     |
| Case Load                                                      | -0.013<br>(0.015)    | -0.011<br>(0.015)    | -0.009<br>(0.015)    | -0.005<br>(0.015)    |
| Financial Slack                                                | 0.061<br>(0.092)     | 0.056<br>(0.087)     | 0.065<br>(0.099)     | 0.057<br>(0.093)     |
| Capital Expenses (log)                                         | 0.040<br>(0.030)     | 0.038<br>(0.029)     | 0.033<br>(0.029)     | 0.027<br>(0.028)     |
| Fixed Assets (log)                                             | 0.154*<br>(0.082)    | 0.167**<br>(0.081)   | 0.177**<br>(0.079)   | 0.204***<br>(0.078)  |
| Net Patient Revenue (log)                                      | -0.242<br>(0.173)    | -0.124<br>(0.171)    | -0.170<br>(0.168)    | 0.055<br>(0.166)     |
| Hospital Size (log)                                            | -0.495***<br>(0.124) | -0.462***<br>(0.124) | -0.450***<br>(0.120) | -0.381***<br>(0.121) |
| Physician Staffing (log)                                       | -0.014<br>(0.043)    | -0.013<br>(0.042)    | -0.021<br>(0.040)    | -0.020<br>(0.037)    |
| Research Focus                                                 | -0.556***<br>(0.150) | -0.508***<br>(0.148) | -0.503***<br>(0.149) | -0.406***<br>(0.148) |
| Number of Hospitals in System (log)                            | -0.077<br>(0.053)    | -0.068<br>(0.053)    | -0.073<br>(0.053)    | -0.057<br>(0.053)    |
| Physician Ownership Status                                     | -0.253<br>(0.249)    | -0.301<br>(0.246)    | -0.276<br>(0.244)    | -0.366<br>(0.239)    |
| HMO                                                            | 0.031<br>(0.174)     | 0.019<br>(0.172)     | 0.036<br>(0.171)     | 0.017<br>(0.168)     |
| PPO                                                            | -0.034<br>(0.197)    | -0.037<br>(0.194)    | -0.051<br>(0.193)    | -0.061<br>(0.189)    |
| Change in Leadership                                           | 0.049<br>(0.066)     | 0.052<br>(0.065)     | 0.038<br>(0.065)     | 0.041<br>(0.064)     |
| Constant                                                       | 10.558***<br>(3.328) | 4.181<br>(3.307)     | 8.816***<br>(3.223)  | 2.968<br>(3.189)     |
| Year Dummies                                                   | Yes                  | Yes                  | Yes                  | Yes                  |
| R <sup>2</sup>                                                 | 0.399                | 0.405                | 0.414                | 0.428                |
| Number of Hospitals                                            | 3,319                | 3,319                | 3,319                | 3,319                |
| Number of Hospital-Year Observations                           | 11,316               | 11,316               | 11,316               | 11,316               |

Notes: \*  $p < 0.1$ ; \*\*  $p < 0.05$ ; \*\*\*  $p < 0.01$ . Robust standard errors in parentheses. Instead of 5% cost reduction, 10% cost reduction is used to calculate the parameter of self-performance improvement when computing aspiration level.

**Table EC-9. Results Using 15% Cost Reduction to Compute Aspiration Level**

| Search Differentiation for HIT                                 | A                    | B                    | C                    | D                    |
|----------------------------------------------------------------|----------------------|----------------------|----------------------|----------------------|
| Cost-Based Performance Shortfalls                              | 0.313**<br>(0.129)   | 0.133<br>(0.128)     | 0.177<br>(0.127)     | 0.583***<br>(0.130)  |
| Conceptualization Phase                                        |                      | 3.268***<br>(0.169)  |                      |                      |
| Enactment Phase                                                |                      |                      | -1.603***<br>(0.167) |                      |
| Enforcement Phase                                              |                      |                      |                      | -2.669***<br>(0.151) |
| Cost-Based Performance Shortfalls ×<br>Conceptualization Phase |                      | 0.429***<br>(0.064)  |                      |                      |
| Cost-Based Performance Shortfalls ×<br>Enactment Phase         |                      |                      | 0.611***<br>(0.051)  |                      |
| Cost-Based Performance Shortfalls ×<br>Enforcement Phase       |                      |                      |                      | -0.753***<br>(0.052) |
| Teaching Status                                                | -1.047**<br>(0.481)  | -0.902**<br>(0.459)  | -0.800*<br>(0.465)   | -0.488<br>(0.434)    |
| Nonprofit Status                                               | 0.281<br>(0.471)     | 0.277<br>(0.468)     | 0.271<br>(0.460)     | 0.261<br>(0.456)     |
| Rural Location                                                 | -0.502<br>(0.360)    | -0.490<br>(0.358)    | -0.517<br>(0.355)    | -0.500<br>(0.353)    |
| Percent Medicare Days                                          | 0.144<br>(0.375)     | 0.110<br>(0.373)     | 0.121<br>(0.367)     | 0.054<br>(0.364)     |
| Case Load                                                      | -0.013<br>(0.015)    | -0.011<br>(0.015)    | -0.009<br>(0.015)    | -0.006<br>(0.015)    |
| Financial Slack                                                | 0.061<br>(0.092)     | 0.056<br>(0.087)     | 0.065<br>(0.099)     | 0.057<br>(0.094)     |
| Capital Expenses (log)                                         | 0.040<br>(0.030)     | 0.038<br>(0.029)     | 0.033<br>(0.029)     | 0.027<br>(0.028)     |
| Fixed Assets (log)                                             | 0.155*<br>(0.082)    | 0.167**<br>(0.081)   | 0.177**<br>(0.079)   | 0.205***<br>(0.078)  |
| Net Patient Revenue (log)                                      | -0.237<br>(0.173)    | -0.120<br>(0.171)    | -0.165<br>(0.168)    | 0.056<br>(0.166)     |
| Hospital Size (log)                                            | -0.494***<br>(0.124) | -0.462***<br>(0.124) | -0.450***<br>(0.120) | -0.383***<br>(0.121) |
| Physician Staffing (log)                                       | -0.014<br>(0.043)    | -0.013<br>(0.042)    | -0.021<br>(0.040)    | -0.020<br>(0.037)    |
| Research Focus                                                 | -0.557***<br>(0.150) | -0.510***<br>(0.148) | -0.505***<br>(0.149) | -0.412***<br>(0.148) |
| Number of Hospitals in System (log)                            | -0.077<br>(0.053)    | -0.068<br>(0.053)    | -0.074<br>(0.053)    | -0.058<br>(0.053)    |
| Physician Ownership Status                                     | -0.254<br>(0.249)    | -0.302<br>(0.246)    | -0.277<br>(0.244)    | -0.367<br>(0.239)    |
| HMO                                                            | 0.031<br>(0.174)     | 0.019<br>(0.172)     | 0.036<br>(0.171)     | 0.016<br>(0.168)     |
| PPO                                                            | -0.034<br>(0.197)    | -0.037<br>(0.194)    | -0.051<br>(0.193)    | -0.060<br>(0.190)    |
| Change in Leadership                                           | 0.049<br>(0.066)     | 0.052<br>(0.065)     | 0.038<br>(0.065)     | 0.042<br>(0.064)     |
| Constant                                                       | 10.493***<br>(3.328) | 4.132<br>(3.308)     | 8.771***<br>(3.225)  | 2.938<br>(3.193)     |
| Year Dummies                                                   | Yes                  | Yes                  | Yes                  | Yes                  |
| R <sup>2</sup>                                                 | 0.399                | 0.404                | 0.414                | 0.427                |
| Number of Hospitals                                            | 3,319                | 3,319                | 3,319                | 3,319                |
| Number of Hospital-Year Observations                           | 11,316               | 11,316               | 11,316               | 11,316               |

Notes: \*  $p < 0.1$ ; \*\*  $p < 0.05$ ; \*\*\*  $p < 0.01$ . Robust standard errors in parentheses. Instead of 5% cost reduction, 15% cost reduction is used to calculate the parameter of self-performance improvement when computing aspiration level.

**Table EC-10. Results Using 20% Cost Reduction to Compute Aspiration Level**

| Search Differentiation for HIT                                 | A                    | B                    | C                    | D                    |
|----------------------------------------------------------------|----------------------|----------------------|----------------------|----------------------|
| Cost-Based Performance Shortfalls                              | 0.289**<br>(0.124)   | 0.118<br>(0.124)     | 0.154<br>(0.123)     | 0.578***<br>(0.126)  |
| Conceptualization Phase                                        |                      | 3.250***<br>(0.173)  |                      |                      |
| Enactment Phase                                                |                      |                      | -1.638***<br>(0.170) |                      |
| Enforcement Phase                                              |                      |                      |                      | -2.633***<br>(0.154) |
| Cost-Based Performance Shortfalls ×<br>Conceptualization Phase |                      | 0.431***<br>(0.065)  |                      |                      |
| Cost-Based Performance Shortfalls ×<br>Enactment Phase         |                      |                      | 0.615***<br>(0.052)  |                      |
| Cost-Based Performance Shortfalls ×<br>Enforcement Phase       |                      |                      |                      | -0.757***<br>(0.053) |
| Teaching Status                                                | -1.048**<br>(0.481)  | -0.904**<br>(0.459)  | -0.804*<br>(0.465)   | -0.495<br>(0.435)    |
| Nonprofit Status                                               | 0.284<br>(0.472)     | 0.279<br>(0.469)     | 0.275<br>(0.461)     | 0.263<br>(0.457)     |
| Rural Location                                                 | -0.502<br>(0.360)    | -0.489<br>(0.358)    | -0.516<br>(0.355)    | -0.498<br>(0.354)    |
| Percent Medicare Days                                          | 0.146<br>(0.375)     | 0.114<br>(0.373)     | 0.123<br>(0.368)     | 0.061<br>(0.364)     |
| Case Load                                                      | -0.013<br>(0.015)    | -0.012<br>(0.015)    | -0.010<br>(0.015)    | -0.006<br>(0.015)    |
| Financial Slack                                                | 0.061<br>(0.092)     | 0.056<br>(0.088)     | 0.064<br>(0.100)     | 0.056<br>(0.095)     |
| Capital Expenses (log)                                         | 0.040<br>(0.030)     | 0.038<br>(0.029)     | 0.033<br>(0.029)     | 0.027<br>(0.028)     |
| Fixed Assets (log)                                             | 0.155*<br>(0.082)    | 0.168**<br>(0.081)   | 0.178**<br>(0.080)   | 0.205***<br>(0.079)  |
| Net Patient Revenue (log)                                      | -0.233<br>(0.173)    | -0.117<br>(0.171)    | -0.161<br>(0.168)    | 0.057<br>(0.166)     |
| Hospital Size (log)                                            | -0.493***<br>(0.124) | -0.462***<br>(0.124) | -0.449***<br>(0.120) | -0.385***<br>(0.121) |
| Physician Staffing (log)                                       | -0.014<br>(0.043)    | -0.013<br>(0.042)    | -0.021<br>(0.040)    | -0.020<br>(0.038)    |
| Research Focus                                                 | -0.557***<br>(0.150) | -0.512***<br>(0.149) | -0.509***<br>(0.149) | -0.419***<br>(0.148) |
| Number of Hospitals in System (log)                            | -0.077<br>(0.053)    | -0.069<br>(0.053)    | -0.075<br>(0.053)    | -0.060<br>(0.053)    |
| Physician Ownership Status                                     | -0.254<br>(0.249)    | -0.302<br>(0.246)    | -0.278<br>(0.244)    | -0.367<br>(0.240)    |
| HMO                                                            | 0.031<br>(0.174)     | 0.020<br>(0.172)     | 0.035<br>(0.171)     | 0.016<br>(0.168)     |
| PPO                                                            | -0.034<br>(0.197)    | -0.037<br>(0.194)    | -0.050<br>(0.193)    | -0.059<br>(0.190)    |
| Change in Leadership                                           | 0.049<br>(0.066)     | 0.052<br>(0.065)     | 0.038<br>(0.065)     | 0.042<br>(0.064)     |
| Constant                                                       | 10.431***<br>(3.328) | 4.092<br>(3.309)     | 8.736***<br>(3.228)  | 2.924<br>(3.198)     |
| Year Dummies                                                   | Yes                  | Yes                  | Yes                  | Yes                  |
| R <sup>2</sup>                                                 | 0.399                | 0.404                | 0.413                | 0.426                |
| Number of Hospitals                                            | 3,319                | 3,319                | 3,319                | 3,319                |
| Number of Hospital-Year Observations                           | 11,316               | 11,316               | 11,316               | 11,316               |

Notes: \*  $p < 0.1$ ; \*\*  $p < 0.05$ ; \*\*\*  $p < 0.01$ . Robust standard errors in parentheses. Instead of 5% cost reduction, 20% cost reduction is used to calculate the parameter of self-performance improvement when computing aspiration level.

**Table EC-11. Results Using Social Aspiration**

| <b>Search Differentiation for HIT</b>                                                               | <b>A</b>             | <b>B</b>             | <b>C</b>             | <b>D</b>             |
|-----------------------------------------------------------------------------------------------------|----------------------|----------------------|----------------------|----------------------|
| Cost-Based Performance Shortfalls (Relative to Social Aspiration)                                   | 1.134***<br>(0.166)  | 0.944***<br>(0.165)  | 0.867***<br>(0.169)  | 1.295***<br>(0.171)  |
| Conceptualization Phase                                                                             |                      | 6.003***<br>(1.214)  |                      |                      |
| Enactment Phase                                                                                     |                      |                      | -2.614***<br>(0.899) |                      |
| Enforcement Phase                                                                                   |                      |                      |                      | -3.393***<br>(0.780) |
| Cost-Based Performance Shortfalls (Relative to Social Aspiration) ×<br>Conceptualization Phase      |                      | 0.480***<br>(0.062)  |                      |                      |
| Social Cost-Based Performance Shortfalls (Relative to Social Aspiration) ×<br>Enactment Phase       |                      |                      | 0.621***<br>(0.047)  |                      |
| Social Cost-Based Performance Shortfalls (Relative to Social Aspiration) ×<br>Enforcement Phase     |                      |                      |                      | -0.801***<br>(0.049) |
| Cost-Based Performance Shortfalls (Relative to Historical Aspiration)                               | -0.452<br>(0.307)    | -0.141<br>(0.310)    | -0.616**<br>(0.311)  | -0.680<br>(0.651)    |
| Cost-Based Performance Shortfalls (Relative to Historical Aspiration) ×<br>Conceptualization Phase  |                      | -2.566**<br>(1.131)  |                      |                      |
| Social Cost-Based Performance Shortfalls (Relative to Historical Aspiration) ×<br>Enactment Phase   |                      |                      | 1.276<br>(0.860)     |                      |
| Social Cost-Based Performance Shortfalls (Relative to Historical Aspiration) ×<br>Enforcement Phase |                      |                      |                      | 0.420<br>(0.716)     |
| Teaching Status                                                                                     | -1.022**<br>(0.481)  | -0.865*<br>(0.459)   | -0.762<br>(0.463)    | -0.422<br>(0.429)    |
| Nonprofit Status                                                                                    | 0.150<br>(0.457)     | 0.122<br>(0.455)     | 0.155<br>(0.450)     | 0.135<br>(0.449)     |
| Rural Location                                                                                      | -0.523<br>(0.359)    | -0.517<br>(0.349)    | -0.558<br>(0.352)    | -0.560<br>(0.344)    |
| Percent Medicare Days                                                                               | 0.112<br>(0.373)     | 0.013<br>(0.369)     | 0.077<br>(0.362)     | -0.065<br>(0.357)    |
| Case Load                                                                                           | -0.011<br>(0.015)    | -0.006<br>(0.014)    | -0.004<br>(0.015)    | 0.004<br>(0.014)     |
| Financial Slack                                                                                     | 0.057<br>(0.092)     | 0.049<br>(0.086)     | 0.072<br>(0.097)     | 0.058<br>(0.086)     |
| Capital Expenses (log)                                                                              | 0.045<br>(0.029)     | 0.043<br>(0.029)     | 0.037<br>(0.029)     | 0.031<br>(0.028)     |
| Fixed Assets (log)                                                                                  | 0.138*<br>(0.081)    | 0.146*<br>(0.080)    | 0.164**<br>(0.078)   | 0.182**<br>(0.077)   |
| Net Patient Revenue (log)                                                                           | -0.339*<br>(0.173)   | -0.276<br>(0.170)    | -0.243<br>(0.167)    | -0.048<br>(0.161)    |
| Hospital Size (log)                                                                                 | -0.536***<br>(0.124) | -0.506***<br>(0.125) | -0.484***<br>(0.119) | -0.397***<br>(0.120) |
| Physician Staffing (log)                                                                            | -0.019<br>(0.043)    | -0.016<br>(0.041)    | -0.021<br>(0.039)    | -0.021<br>(0.037)    |
| Research Focus                                                                                      | -0.549***<br>(0.149) | -0.485***<br>(0.147) | -0.479***<br>(0.147) | -0.342**<br>(0.145)  |
| Number of Hospitals in System (log)                                                                 | -0.063<br>(0.053)    | -0.054<br>(0.052)    | -0.056<br>(0.052)    | -0.034<br>(0.052)    |
| Physician Ownership Status                                                                          | -0.287<br>(0.253)    | -0.311<br>(0.250)    | -0.299<br>(0.245)    | -0.376<br>(0.240)    |
| HMO                                                                                                 | 0.018<br>(0.174)     | 0.005<br>(0.170)     | 0.034<br>(0.170)     | 0.021<br>(0.166)     |
| PPO                                                                                                 | -0.051<br>(0.196)    | -0.050<br>(0.193)    | -0.085<br>(0.191)    | -0.093<br>(0.187)    |
| Change in Leadership                                                                                | 0.053<br>(0.066)     | 0.054<br>(0.065)     | 0.042<br>(0.065)     | 0.040<br>(0.064)     |
| Constant                                                                                            | 12.500***<br>(3.314) | 7.012**<br>(3.269)   | 10.441***<br>(3.192) | 5.433*<br>(3.163)    |
| Year Dummies                                                                                        | Yes                  | Yes                  | Yes                  | Yes                  |
| R <sup>2</sup>                                                                                      | 0.402                | 0.410                | 0.421                | 0.438                |
| Number of Hospitals                                                                                 | 3,319                | 3,319                | 3,319                | 3,319                |
| Number of Hospital-Year Observations                                                                | 11,317               | 11,317               | 11,317               | 11,317               |

Notes: \*  $p < 0.1$ ; \*\*  $p < 0.05$ ; \*\*\*  $p < 0.01$ . Robust standard errors in parentheses.

**Table EC-12. Results Using Cost-Based Performance Shortfalls Normalized by Number of Beds**

| <b>Search Differentiation for HIT</b>                               | <b>A</b>             | <b>B</b>             | <b>C</b>             | <b>D</b>             |
|---------------------------------------------------------------------|----------------------|----------------------|----------------------|----------------------|
| Cost-Based Performance Shortfalls<br>(Normalized by Number of Beds) | 0.208**<br>(0.086)   | 0.128<br>(0.087)     | 0.106<br>(0.087)     | 0.623***<br>(0.104)  |
| Conceptualization Phase                                             |                      | 3.996***<br>(0.130)  |                      |                      |
| Enactment Phase                                                     |                      |                      | -0.762***<br>(0.144) |                      |
| Enforcement Phase                                                   |                      |                      |                      | -3.828***<br>(0.123) |
| Cost-Based Performance Shortfalls × Conceptualization Phase         |                      | 0.431***<br>(0.100)  |                      |                      |
| Cost-Based Performance Shortfalls × Enactment Phase                 |                      |                      | 0.507***<br>(0.081)  |                      |
| Cost-Based Performance Shortfalls × Enforcement Phase               |                      |                      |                      | -0.677***<br>(0.083) |
| Teaching Status                                                     | -0.767<br>(0.493)    | -0.738<br>(0.496)    | -0.739<br>(0.497)    | -0.685<br>(0.505)    |
| Nonprofit Status                                                    | -0.037<br>(0.481)    | 0.044<br>(0.473)     | 0.010<br>(0.470)     | 0.153<br>(0.456)     |
| Rural Location                                                      | -0.527<br>(0.369)    | -0.545<br>(0.375)    | -0.563<br>(0.376)    | -0.602<br>(0.391)    |
| Percent Medicare Days                                               | -0.165<br>(0.396)    | -0.175<br>(0.395)    | -0.143<br>(0.393)    | -0.150<br>(0.392)    |
| Case Load                                                           | -0.033*<br>(0.018)   | -0.031*<br>(0.017)   | -0.031*<br>(0.018)   | -0.026<br>(0.017)    |
| Financial Slack                                                     | 0.032<br>(0.114)     | 0.037<br>(0.117)     | 0.020<br>(0.112)     | 0.023<br>(0.115)     |
| Capital Expenses (log)                                              | 0.025<br>(0.032)     | 0.025<br>(0.032)     | 0.025<br>(0.031)     | 0.023<br>(0.031)     |
| Fixed Assets (log)                                                  | 0.100<br>(0.106)     | 0.104<br>(0.105)     | 0.094<br>(0.107)     | 0.098<br>(0.106)     |
| Net Patient Revenue (log)                                           | -0.244<br>(0.194)    | -0.185<br>(0.191)    | -0.167<br>(0.192)    | -0.050<br>(0.189)    |
| Hospital Size (log)                                                 | -0.033<br>(0.044)    | -0.030<br>(0.043)    | -0.037<br>(0.043)    | -0.034<br>(0.042)    |
| Physician Staffing (log)                                            | -0.530***<br>(0.152) | -0.492***<br>(0.152) | -0.533***<br>(0.150) | -0.476***<br>(0.150) |
| Research Focus                                                      | -0.050<br>(0.056)    | -0.045<br>(0.055)    | -0.049<br>(0.055)    | -0.040<br>(0.055)    |
| Number of Hospitals in System (log)                                 | -0.228<br>(0.273)    | -0.186<br>(0.269)    | -0.168<br>(0.269)    | -0.082<br>(0.264)    |
| Physician Ownership Status                                          | 0.053<br>(0.179)     | 0.049<br>(0.178)     | 0.072<br>(0.178)     | 0.073<br>(0.178)     |
| HMO                                                                 | -0.059<br>(0.205)    | -0.063<br>(0.205)    | -0.080<br>(0.204)    | -0.093<br>(0.204)    |
| PPO                                                                 | 0.063<br>(0.069)     | 0.062<br>(0.069)     | 0.065<br>(0.069)     | 0.064<br>(0.068)     |
| Change in Leadership                                                | 11.028***<br>(3.893) | 5.516<br>(3.877)     | 9.716**<br>(3.856)   | 6.892*<br>(3.796)    |
| Constant                                                            | 0.208**<br>(0.086)   | 0.128<br>(0.087)     | 0.106<br>(0.087)     | 0.623***<br>(0.104)  |
| Year Dummies                                                        | Yes                  | Yes                  | Yes                  | Yes                  |
| R <sup>2</sup>                                                      | 0.414                | 0.417                | 0.419                | 0.424                |
| Number of Hospitals                                                 | 2,900                | 2,900                | 2,900                | 2,900                |
| Number of Hospital-Year Observations                                | 10,259               | 10,259               | 10,259               | 10,259               |

Notes: \*  $p < 0.1$ ; \*\*  $p < 0.05$ ; \*\*\*  $p < 0.01$ . Robust standard errors in parentheses.

**Table EC-13. Results Using Cost-Based Performance Shortfalls Normalized by Number of Inpatient Days**

| <b>Search Differentiation for HIT</b>                                         | <b>A</b>             | <b>B</b>             | <b>C</b>             | <b>D</b>             |
|-------------------------------------------------------------------------------|----------------------|----------------------|----------------------|----------------------|
| Cost-Based Performance Shortfalls<br>(Normalized by Number of Inpatient Days) | 0.283**<br>(0.111)   | 0.239**<br>(0.111)   | 0.125<br>(0.113)     | 0.790***<br>(0.147)  |
| Conceptualization Phase                                                       |                      | 3.956***<br>(0.145)  |                      |                      |
| Enactment Phase                                                               |                      |                      | -0.901***<br>(0.154) |                      |
| Enforcement Phase                                                             |                      |                      |                      | -3.612***<br>(0.133) |
| Cost-Based Performance Shortfalls × Conceptualization Phase                   |                      | 0.301**<br>(0.151)   |                      |                      |
| Cost-Based Performance Shortfalls × Enactment Phase                           |                      |                      | 0.738***<br>(0.123)  |                      |
| Cost-Based Performance Shortfalls × Enforcement Phase                         |                      |                      |                      | -0.793***<br>(0.126) |
| Teaching Status                                                               | -1.061**<br>(0.480)  | -1.057**<br>(0.481)  | -1.029**<br>(0.479)  | -1.018**<br>(0.481)  |
| Nonprofit Status                                                              | 0.283<br>(0.469)     | 0.314<br>(0.467)     | 0.298<br>(0.466)     | 0.381<br>(0.462)     |
| Rural Location                                                                | -0.469<br>(0.363)    | -0.480<br>(0.365)    | -0.483<br>(0.372)    | -0.512<br>(0.380)    |
| Percent Medicare Days                                                         | 0.081<br>(0.378)     | 0.081<br>(0.377)     | 0.078<br>(0.376)     | 0.076<br>(0.374)     |
| Case Load                                                                     | -0.011<br>(0.015)    | -0.011<br>(0.015)    | -0.014<br>(0.015)    | -0.013<br>(0.015)    |
| Financial Slack                                                               | 0.058<br>(0.092)     | 0.055<br>(0.090)     | 0.076<br>(0.091)     | 0.070<br>(0.085)     |
| Capital Expenses (log)                                                        | 0.042<br>(0.030)     | 0.041<br>(0.029)     | 0.038<br>(0.029)     | 0.035<br>(0.029)     |
| Fixed Assets (log)                                                            | 0.113<br>(0.088)     | 0.112<br>(0.087)     | 0.115<br>(0.087)     | 0.112<br>(0.087)     |
| Net Patient Revenue (log)                                                     | -0.153<br>(0.171)    | -0.137<br>(0.170)    | -0.152<br>(0.171)    | -0.110<br>(0.169)    |
| Hospital Size (log)                                                           | -0.487***<br>(0.125) | -0.489***<br>(0.125) | -0.474***<br>(0.124) | -0.476***<br>(0.125) |
| Physician Staffing (log)                                                      | -0.012<br>(0.043)    | -0.012<br>(0.043)    | -0.016<br>(0.042)    | -0.017<br>(0.042)    |
| Research Focus                                                                | -0.549***<br>(0.151) | -0.541***<br>(0.150) | -0.549***<br>(0.149) | -0.529***<br>(0.147) |
| Number of Hospitals in System (log)                                           | -0.072<br>(0.053)    | -0.071<br>(0.053)    | -0.076<br>(0.052)    | -0.075<br>(0.052)    |
| Physician Ownership Status                                                    | -0.273<br>(0.249)    | -0.276<br>(0.249)    | -0.273<br>(0.248)    | -0.282<br>(0.250)    |
| HMO                                                                           | 0.032<br>(0.175)     | 0.032<br>(0.175)     | 0.021<br>(0.175)     | 0.020<br>(0.176)     |
| PPO                                                                           | -0.041<br>(0.197)    | -0.043<br>(0.197)    | -0.040<br>(0.196)    | -0.045<br>(0.197)    |
| Change in Leadership                                                          | 0.044<br>(0.066)     | 0.042<br>(0.066)     | 0.046<br>(0.065)     | 0.041<br>(0.065)     |
| Constant                                                                      | 10.065***<br>(3.296) | 5.648*<br>(3.307)    | 10.145***<br>(3.277) | 8.939***<br>(3.255)  |
| Year Dummies                                                                  | Yes                  | Yes                  | Yes                  | Yes                  |
| R <sup>2</sup>                                                                | 0.398                | 0.399                | 0.402                | 0.404                |
| Number of Hospitals                                                           | 3,331                | 3,331                | 3,331                | 3,331                |
| Number of Hospital-Year Observations                                          | 11,357               | 11,357               | 11,357               | 11,357               |

Notes: \*  $p < 0.1$ ; \*\*  $p < 0.05$ ; \*\*\*  $p < 0.01$ . Robust standard errors in parentheses.

## Sensitivity Analysis for Reference Groups

**Table EC-14. Results Using Nonprofit Hospitals as Reference Group**

| Search Differentiation for HIT                              | A                    | B                    | C                    | D                    |
|-------------------------------------------------------------|----------------------|----------------------|----------------------|----------------------|
| Cost-Based Performance Shortfalls                           | 0.272*<br>(0.168)    | 0.122<br>(0.162)     | 0.119<br>(0.166)     | 0.774***<br>(0.171)  |
| Conceptualization Phase                                     |                      | 3.720***<br>(0.179)  |                      |                      |
| Enactment Phase                                             |                      |                      | -1.788***<br>(0.170) |                      |
| Enforcement Phase                                           |                      |                      |                      | -3.292***<br>(0.158) |
| Cost-Based Performance Shortfalls × Conceptualization Phase |                      | 0.648***<br>(0.085)  |                      |                      |
| Cost-Based Performance Shortfalls × Enactment Phase         |                      |                      | 0.688***<br>(0.067)  |                      |
| Cost-Based Performance Shortfalls × Enforcement Phase       |                      |                      |                      | -0.921***<br>(0.069) |
| Teaching Status                                             | -0.890*<br>(0.474)   | -0.696<br>(0.454)    | -0.692<br>(0.461)    | -0.349<br>(0.439)    |
| Rural Location                                              | -0.544<br>(0.333)    | -0.544*<br>(0.328)   | -0.564*<br>(0.326)   | -0.571*<br>(0.317)   |
| Percent Medicare Days                                       | -0.015<br>(0.376)    | -0.044<br>(0.373)    | -0.011<br>(0.368)    | -0.050<br>(0.362)    |
| Case Load                                                   | -0.030<br>(0.019)    | -0.026<br>(0.018)    | -0.024<br>(0.018)    | -0.018<br>(0.018)    |
| Financial Slack                                             | 0.091<br>(0.087)     | 0.086<br>(0.082)     | 0.091<br>(0.092)     | 0.085<br>(0.087)     |
| Capital Expenses (log)                                      | 0.048<br>(0.031)     | 0.047<br>(0.030)     | 0.042<br>(0.030)     | 0.038<br>(0.030)     |
| Fixed Assets (log)                                          | 0.149*<br>(0.087)    | 0.162*<br>(0.086)    | 0.165*<br>(0.085)    | 0.188**<br>(0.084)   |
| Net Patient Revenue (log)                                   | -0.409**<br>(0.169)  | -0.267<br>(0.165)    | -0.319*<br>(0.164)   | -0.087<br>(0.161)    |
| Hospital Size (log)                                         | -0.400***<br>(0.127) | -0.369***<br>(0.125) | -0.364***<br>(0.123) | -0.308**<br>(0.121)  |
| Physician Staffing (log)                                    | -0.014<br>(0.043)    | -0.013<br>(0.041)    | -0.021<br>(0.039)    | -0.021<br>(0.037)    |
| Research Focus                                              | -0.472***<br>(0.151) | -0.437***<br>(0.149) | -0.444***<br>(0.151) | -0.385**<br>(0.150)  |
| Number of Hospitals in System (log)                         | -0.056<br>(0.055)    | -0.047<br>(0.054)    | -0.054<br>(0.054)    | -0.041<br>(0.055)    |
| Physician Ownership Status                                  | 0.012<br>(0.274)     | -0.034<br>(0.273)    | -0.040<br>(0.271)    | -0.123<br>(0.268)    |
| HMO                                                         | 0.151<br>(0.169)     | 0.130<br>(0.167)     | 0.144<br>(0.166)     | 0.111<br>(0.163)     |
| PPO                                                         | -0.160<br>(0.196)    | -0.153<br>(0.193)    | -0.168<br>(0.192)    | -0.160<br>(0.188)    |
| Change in Leadership                                        | 0.072<br>(0.068)     | 0.078<br>(0.068)     | 0.060<br>(0.068)     | 0.064<br>(0.067)     |
| Constant                                                    | 13.648***<br>(3.328) | 5.968*<br>(3.270)    | 11.710***<br>(3.226) | 5.423*<br>(3.182)    |
| Year Dummies                                                | Yes                  | Yes                  | Yes                  | Yes                  |
| R <sup>2</sup>                                              | 0.505                | 0.512                | 0.516                | 0.529                |
| Number of Hospitals                                         | 2,628                | 2,628                | 2,628                | 2,628                |
| Number of Hospital-Year Observations                        | 9,554                | 9,554                | 9,554                | 9,554                |

Notes: \*  $p < 0.1$ ; \*\*  $p < 0.05$ ; \*\*\*  $p < 0.01$ . Robust standard errors in parentheses. Cost-based performance shortfalls and search differentiation for HIT are calculated using all other nonprofit hospitals as the reference group.

**Table EC-15. Results Using Rural Hospitals as Reference Group**

| <b>Search Differentiation for HIT</b>                          | <b>A</b>            | <b>B</b>            | <b>C</b>            | <b>D</b>             |
|----------------------------------------------------------------|---------------------|---------------------|---------------------|----------------------|
| Cost-Based Performance Shortfalls                              | 0.900*<br>(0.545)   | 0.577<br>(0.556)    | 0.533<br>(0.563)    | 1.251**<br>(0.590)   |
| Conceptualization Phase                                        |                     | 2.814***<br>(0.728) |                     |                      |
| Enactment Phase                                                |                     |                     | -1.594**<br>(0.668) |                      |
| Enforcement Phase                                              |                     |                     |                     | -2.217***<br>(0.612) |
| Cost-Based Performance Shortfalls ×<br>Conceptualization Phase |                     | 0.713**<br>(0.361)  |                     |                      |
| Cost-Based Performance Shortfalls ×<br>Enactment Phase         |                     |                     | 0.762***<br>(0.280) |                      |
| Cost-Based Performance Shortfalls ×<br>Enforcement Phase       |                     |                     |                     | -1.055***<br>(0.257) |
| Nonprofit Status                                               | 2.480<br>(3.368)    | 2.538<br>(3.415)    | 2.675<br>(3.350)    | 2.835<br>(3.417)     |
| Percent Medicare Days                                          | -0.236<br>(0.692)   | -0.289<br>(0.692)   | -0.261<br>(0.688)   | -0.350<br>(0.688)    |
| Case Load                                                      | -0.101<br>(0.071)   | -0.092<br>(0.071)   | -0.087<br>(0.070)   | -0.068<br>(0.070)    |
| Financial Slack                                                | 0.219<br>(0.446)    | 0.250<br>(0.443)    | 0.195<br>(0.450)    | 0.231<br>(0.444)     |
| Capital Expenses (log)                                         | 0.041<br>(0.100)    | 0.040<br>(0.100)    | 0.054<br>(0.099)    | 0.058<br>(0.099)     |
| Fixed Assets (log)                                             | 0.204<br>(0.420)    | 0.165<br>(0.423)    | 0.153<br>(0.417)    | 0.077<br>(0.422)     |
| Net Patient Revenue (log)                                      | 0.581<br>(0.644)    | 0.640<br>(0.626)    | 0.582<br>(0.655)    | 0.670<br>(0.632)     |
| Hospital Size (log)                                            | -0.241<br>(0.339)   | -0.244<br>(0.334)   | -0.219<br>(0.349)   | -0.214<br>(0.347)    |
| Physician Staffing (log)                                       | -0.492**<br>(0.201) | -0.483**<br>(0.199) | -0.436**<br>(0.205) | -0.400**<br>(0.204)  |
| Research Focus                                                 | -0.882<br>(1.398)   | -0.731<br>(1.320)   | -1.045<br>(1.423)   | -0.884<br>(1.334)    |
| Number of Hospitals in System (log)                            | 0.221<br>(0.233)    | 0.255<br>(0.227)    | 0.241<br>(0.234)    | 0.300<br>(0.227)     |
| Physician Ownership Status                                     | -1.327*<br>(0.768)  | -1.269<br>(0.784)   | -1.302*<br>(0.756)  | -1.206<br>(0.775)    |
| HMO                                                            | -0.045<br>(0.478)   | -0.074<br>(0.482)   | -0.024<br>(0.474)   | -0.060<br>(0.482)    |
| PPO                                                            | 0.067<br>(0.495)    | 0.055<br>(0.495)    | 0.033<br>(0.491)    | 0.003<br>(0.493)     |
| Change in Leadership                                           | -0.081<br>(0.259)   | -0.107<br>(0.258)   | -0.044<br>(0.260)   | -0.068<br>(0.260)    |
| Constant                                                       | -7.949<br>(11.557)  | -12.140<br>(11.438) | -7.412<br>(11.618)  | -9.241<br>(11.363)   |
| Year Dummies                                                   | Yes                 | Yes                 | Yes                 | Yes                  |
| R <sup>2</sup>                                                 | 0.244               | 0.247               | 0.250               | 0.258                |
| Number of Hospitals                                            | 535                 | 535                 | 535                 | 535                  |
| Number of Hospital-Year Observations                           | 1,726               | 1,726               | 1,726               | 1,726                |

Notes: \*  $p < 0.1$ ; \*\*  $p < 0.05$ ; \*\*\*  $p < 0.01$ . Robust standard errors in parentheses. Cost-based performance shortfalls and search differentiation for HIT are calculated using all other rural hospitals as the reference group.

**Table EC-16. Results Using Hospitals within the Same System as Reference Group**

| Search Differentiation for HIT                                 | A                    | B                    | C                    | D                    |
|----------------------------------------------------------------|----------------------|----------------------|----------------------|----------------------|
| Cost-Based Performance Shortfalls                              | 0.177***<br>(0.034)  | 0.105***<br>(0.036)  | 0.115***<br>(0.035)  | 0.470***<br>(0.049)  |
| Conceptualization Phase                                        |                      | 0.720***<br>(0.156)  |                      |                      |
| Enactment Phase                                                |                      |                      | 0.825***<br>(0.142)  |                      |
| Enforcement Phase                                              |                      |                      |                      | -1.141***<br>(0.115) |
| Cost-Based Performance Shortfalls ×<br>Conceptualization Phase |                      | 0.324***<br>(0.072)  |                      |                      |
| Cost-Based Performance Shortfalls × Enactment<br>Phase         |                      |                      | 0.440***<br>(0.070)  |                      |
| Cost-Based Performance Shortfalls ×<br>Enforcement Phase       |                      |                      |                      | -0.462***<br>(0.054) |
| Teaching Status                                                | -0.047<br>(0.162)    | 0.038<br>(0.160)     | 0.044<br>(0.158)     | 0.192<br>(0.155)     |
| Nonprofit Status                                               | -0.512**<br>(0.208)  | -0.529**<br>(0.206)  | -0.459**<br>(0.204)  | -0.471**<br>(0.200)  |
| Rural Location                                                 | 0.002<br>(0.138)     | 0.046<br>(0.136)     | 0.036<br>(0.134)     | 0.108<br>(0.131)     |
| Percent Medicare Days                                          | -0.303<br>(0.218)    | -0.203<br>(0.216)    | -0.206<br>(0.213)    | -0.034<br>(0.208)    |
| Case Load                                                      | -0.002<br>(0.010)    | -0.014<br>(0.010)    | -0.006<br>(0.010)    | -0.026***<br>(0.009) |
| Financial Slack                                                | 0.005<br>(0.010)     | 0.007<br>(0.010)     | 0.005<br>(0.010)     | 0.007<br>(0.010)     |
| Capital Expenses (log)                                         | 0.073**<br>(0.035)   | 0.034<br>(0.034)     | 0.103***<br>(0.034)  | 0.052<br>(0.033)     |
| Fixed Assets (log)                                             | -0.019<br>(0.053)    | 0.008<br>(0.053)     | -0.002<br>(0.052)    | 0.043<br>(0.051)     |
| Net Patient Revenue (log)                                      | 0.176**<br>(0.086)   | 0.264***<br>(0.085)  | 0.146*<br>(0.084)    | 0.276***<br>(0.082)  |
| Hospital Size (log)                                            | 0.316***<br>(0.045)  | 0.301***<br>(0.044)  | 0.294***<br>(0.044)  | 0.266***<br>(0.043)  |
| Physician Staffing (log)                                       | -0.047<br>(0.029)    | -0.053*<br>(0.029)   | -0.044<br>(0.028)    | -0.054*<br>(0.028)   |
| Research Focus                                                 | -0.270***<br>(0.104) | -0.253**<br>(0.103)  | -0.266***<br>(0.102) | -0.240**<br>(0.099)  |
| Number of Hospitals in System (log)                            | 1.162***<br>(0.070)  | 1.171***<br>(0.070)  | 1.155***<br>(0.069)  | 1.170***<br>(0.068)  |
| Physician Ownership Status                                     | 0.366<br>(0.235)     | 0.404*<br>(0.233)    | 0.454**<br>(0.230)   | 0.534**<br>(0.225)   |
| HMO                                                            | -0.240*<br>(0.140)   | -0.192<br>(0.138)    | -0.225*<br>(0.136)   | -0.145<br>(0.133)    |
| PPO                                                            | 0.123<br>(0.156)     | 0.072<br>(0.155)     | 0.110<br>(0.152)     | 0.030<br>(0.149)     |
| Change in Leadership                                           | 0.252***<br>(0.093)  | 0.231**<br>(0.091)   | 0.237***<br>(0.090)  | 0.202**<br>(0.088)   |
| Constant                                                       | -4.579***<br>(1.168) | -6.100***<br>(1.161) | -5.051***<br>(1.143) | -6.442***<br>(1.117) |
| Variance(System)                                               | 1.260                | 1.228                | 1.212                | 1.211                |
| Variance(Hospital)                                             | 8.959                | 8.754                | 8.518                | 8.105                |
| Number of Systems                                              | 422                  | 422                  | 422                  | 422                  |
| Number of Observations                                         | 7,364                | 7,364                | 7,364                | 7,364                |

Notes: \*  $p < 0.1$ ; \*\*  $p < 0.05$ ; \*\*\*  $p < 0.01$ . Robust standard errors in parentheses. Cost-based performance shortfalls and search differentiation for HIT are calculated using all other hospitals within the same system as the reference group. A multilevel model is used to account for the system that a hospital belongs to in this analysis.

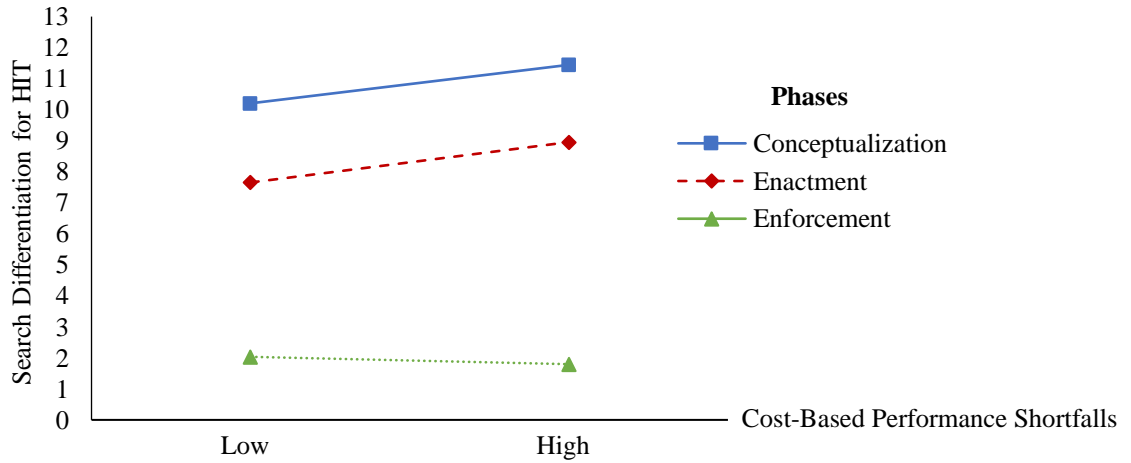

**Figure EC-1. Interaction Plot for Nonprofit Hospitals as Reference Group**

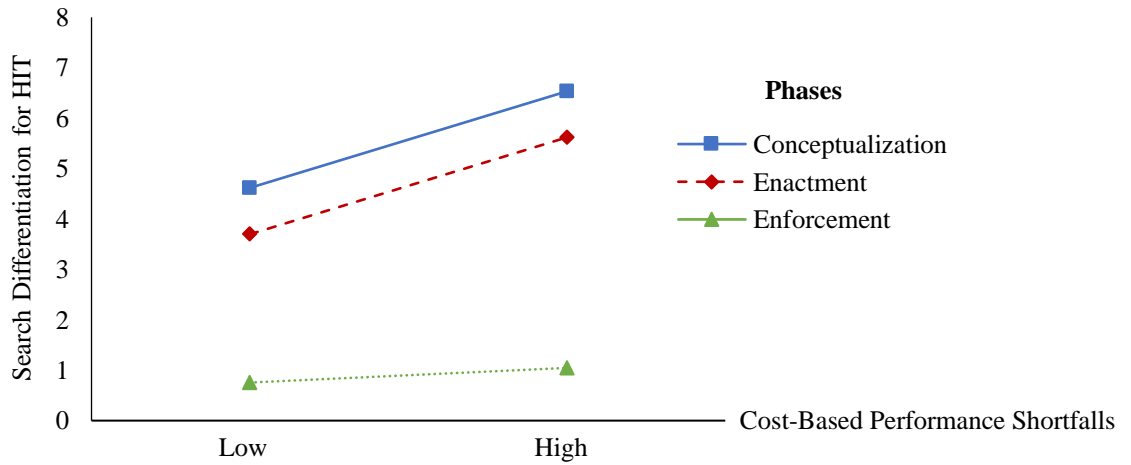

**Figure EC-2. Interaction Plot for Rural Hospitals as Reference Group**

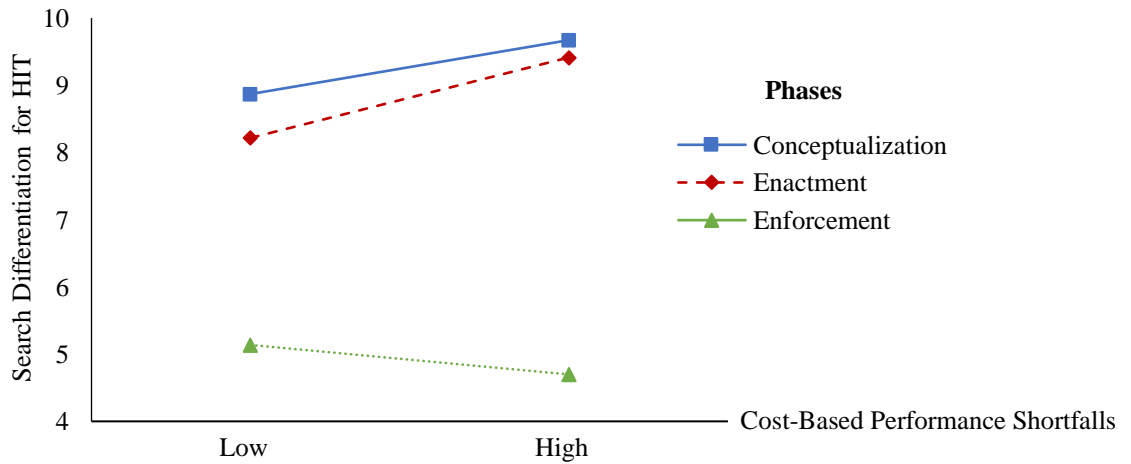

**Figure EC-3. Interaction Plot for Hospitals within the Same System as Reference Group**

**Table EC-17. Results Using Top Performers as Reference Group**

| Search Differentiation for HIT                                 | A                    | B                    | C                    | D                    |
|----------------------------------------------------------------|----------------------|----------------------|----------------------|----------------------|
| Cost-Based Performance Shortfalls                              | 0.359***<br>(0.135)  | 0.166<br>(0.135)     | 0.223*<br>(0.135)    | 0.595***<br>(0.137)  |
| Conceptualization Phase                                        |                      | 3.301***<br>(0.163)  |                      |                      |
| Enactment Phase                                                |                      |                      | -1.542***<br>(0.163) |                      |
| Enforcement Phase                                              |                      |                      |                      | -2.731***<br>(0.147) |
| Cost-Based Performance Shortfalls ×<br>Conceptualization Phase |                      | 0.422***<br>(0.062)  |                      |                      |
| Cost-Based Performance Shortfalls ×<br>Enactment Phase         |                      |                      | 0.602***<br>(0.049)  |                      |
| Cost-Based Performance Shortfalls ×<br>Enforcement Phase       |                      |                      |                      | -0.744***<br>(0.050) |
| Teaching Status                                                | -1.046**<br>(0.481)  | -0.900**<br>(0.458)  | -0.794*<br>(0.465)   | -0.477<br>(0.433)    |
| Nonprofit Status                                               | 0.272<br>(0.470)     | 0.271<br>(0.467)     | 0.263<br>(0.459)     | 0.257<br>(0.455)     |
| Rural Location                                                 | -0.502<br>(0.359)    | -0.490<br>(0.357)    | -0.520<br>(0.354)    | -0.503<br>(0.352)    |
| Percent Medicare Days                                          | 0.141<br>(0.375)     | 0.102<br>(0.373)     | 0.116<br>(0.367)     | 0.042<br>(0.363)     |
| Case Load                                                      | -0.013<br>(0.015)    | -0.011<br>(0.015)    | -0.009<br>(0.015)    | -0.005<br>(0.015)    |
| Financial Slack                                                | 0.061<br>(0.092)     | 0.055<br>(0.087)     | 0.066<br>(0.099)     | 0.058<br>(0.093)     |
| Capital Expenses (log)                                         | 0.040<br>(0.030)     | 0.038<br>(0.029)     | 0.033<br>(0.029)     | 0.027<br>(0.028)     |
| Fixed Assets (log)                                             | 0.154*<br>(0.082)    | 0.166**<br>(0.081)   | 0.177**<br>(0.079)   | 0.204***<br>(0.078)  |
| Net Patient Revenue (log)                                      | -0.246<br>(0.174)    | -0.127<br>(0.171)    | -0.174<br>(0.168)    | 0.053<br>(0.166)     |
| Hospital Size (log)                                            | -0.496***<br>(0.124) | -0.462***<br>(0.124) | -0.451***<br>(0.120) | -0.380***<br>(0.121) |
| Physician Staffing (log)                                       | -0.014<br>(0.043)    | -0.013<br>(0.042)    | -0.021<br>(0.040)    | -0.020<br>(0.037)    |
| Research Focus                                                 | -0.556***<br>(0.150) | -0.506***<br>(0.148) | -0.500***<br>(0.149) | -0.400***<br>(0.148) |
| Number of Hospitals in System (log)                            | -0.076<br>(0.053)    | -0.067<br>(0.053)    | -0.073<br>(0.053)    | -0.056<br>(0.053)    |
| Physician Ownership Status                                     | -0.253<br>(0.249)    | -0.301<br>(0.246)    | -0.276<br>(0.243)    | -0.366<br>(0.238)    |
| HMO                                                            | 0.030<br>(0.174)     | 0.019<br>(0.172)     | 0.036<br>(0.171)     | 0.017<br>(0.168)     |
| PPO                                                            | -0.034<br>(0.197)    | -0.037<br>(0.194)    | -0.052<br>(0.193)    | -0.062<br>(0.189)    |
| Change in Leadership                                           | 0.049<br>(0.066)     | 0.052<br>(0.065)     | 0.038<br>(0.065)     | 0.041<br>(0.064)     |
| Constant                                                       | 10.622***<br>(3.329) | 4.228<br>(3.307)     | 8.864***<br>(3.221)  | 3.000<br>(3.185)     |
| Year Dummies                                                   | Yes                  | Yes                  | Yes                  | Yes                  |
| R <sup>2</sup>                                                 | 0.399                | 0.405                | 0.414                | 0.428                |
| Number of Hospitals                                            | 3,319                | 3,319                | 3,319                | 3,319                |
| Number of Hospital-Year Observations                           | 11,316               | 11,316               | 11,316               | 11,316               |

Notes: \*  $p < 0.1$ ; \*\*  $p < 0.05$ ; \*\*\*  $p < 0.01$ . Robust standard errors in parentheses. Cost-Based Performance Shortfalls is calculated using top performers above 90<sup>th</sup> percentile as the reference group.

Alternative Model Specifications

**Table EC-18. Hausman Test for Hospital Fixed Effects and Random Effects Models**

|         | <b>Chi-square</b> | <b><i>p</i>-value</b> |
|---------|-------------------|-----------------------|
| Model A | 160.28            | 0.0001                |
| Model B | 138.57            | 0.0001                |
| Model C | 131.80            | 0.0001                |
| Model D | 93.51             | 0.0001                |

*Notes:* The Hausman test rejects the null hypothesis in favor of a hospital random effects model specification and thus, a hospital fixed effects model specification is appropriate.

**Table EC-19. Hospital Random Effects Model Results**

| Search Differentiation for HIT                              | A                    | B                     | C                    | D                    |
|-------------------------------------------------------------|----------------------|-----------------------|----------------------|----------------------|
| Cost-Based Performance Shortfalls                           | 0.080*<br>(0.049)    | -0.186***<br>(0.050)  | -0.227***<br>(0.049) | 0.354***<br>(0.052)  |
| Conceptualization Phase                                     |                      | 3.358***<br>(0.114)   |                      |                      |
| Enactment Phase                                             |                      |                       | -1.799***<br>(0.125) |                      |
| Enforcement Phase                                           |                      |                       |                      | -2.783***<br>(0.098) |
| Cost-Based Performance Shortfalls × Conceptualization Phase |                      | 0.474***<br>(0.046)   |                      |                      |
| Cost-Based Performance Shortfalls × Enactment Phase         |                      |                       | 0.657***<br>(0.040)  |                      |
| Cost-Based Performance Shortfalls × Enforcement Phase       |                      |                       |                      | -0.786***<br>(0.034) |
| Teaching Status                                             | -0.166<br>(0.148)    | -0.174<br>(0.148)     | -0.141<br>(0.147)    | -0.148<br>(0.147)    |
| Nonprofit Status                                            | 0.802***<br>(0.105)  | 0.794***<br>(0.105)   | 0.785***<br>(0.104)  | 0.767***<br>(0.104)  |
| Rural Location                                              | 0.196*<br>(0.107)    | 0.214**<br>(0.107)    | 0.205*<br>(0.107)    | 0.237**<br>(0.107)   |
| Percent Medicare Days                                       | 0.130<br>(0.154)     | 0.109<br>(0.153)      | 0.123<br>(0.153)     | 0.086<br>(0.152)     |
| Case Load                                                   | -0.021***<br>(0.007) | -0.022***<br>(0.007)  | -0.020***<br>(0.007) | -0.021***<br>(0.007) |
| Financial Slack                                             | 0.008<br>(0.009)     | 0.007<br>(0.009)      | 0.008<br>(0.008)     | 0.006<br>(0.008)     |
| Capital Expenses (log)                                      | 0.086***<br>(0.022)  | 0.083***<br>(0.022)   | 0.079***<br>(0.022)  | 0.071***<br>(0.022)  |
| Fixed Assets (log)                                          | 0.255***<br>(0.039)  | 0.252***<br>(0.039)   | 0.256***<br>(0.039)  | 0.251***<br>(0.038)  |
| Net Patient Revenue (log)                                   | 0.387***<br>(0.064)  | 0.411***<br>(0.064)   | 0.393***<br>(0.064)  | 0.434***<br>(0.064)  |
| Hospital Size (log)                                         | 0.196***<br>(0.029)  | 0.195***<br>(0.029)   | 0.195***<br>(0.029)  | 0.194***<br>(0.029)  |
| Physician Staffing (log)                                    | -0.013<br>(0.021)    | -0.013<br>(0.021)     | -0.014<br>(0.021)    | -0.013<br>(0.021)    |
| Research Focus                                              | -0.252***<br>(0.081) | -0.224***<br>(0.080)  | -0.240***<br>(0.080) | -0.190**<br>(0.079)  |
| Number of Hospitals in System (log)                         | 0.068***<br>(0.021)  | 0.068***<br>(0.021)   | 0.065***<br>(0.021)  | 0.064***<br>(0.021)  |
| Physician Ownership Status                                  | -0.071<br>(0.149)    | -0.091<br>(0.149)     | -0.104<br>(0.148)    | -0.145<br>(0.147)    |
| HMO                                                         | 0.085<br>(0.091)     | 0.075<br>(0.090)      | 0.082<br>(0.090)     | 0.065<br>(0.089)     |
| PPO                                                         | -0.018<br>(0.101)    | -0.015<br>(0.101)     | -0.028<br>(0.100)    | -0.023<br>(0.100)    |
| Change in Leadership                                        | 0.056<br>(0.058)     | 0.061<br>(0.057)      | 0.043<br>(0.057)     | 0.048<br>(0.056)     |
| Constant                                                    | -6.901***<br>(0.848) | -11.262***<br>(0.859) | -6.622***<br>(0.842) | -8.240***<br>(0.841) |
| Year Dummies                                                | Yes                  | Yes                   | Yes                  | Yes                  |
| R <sup>2</sup>                                              | 7046.40              | 7203.82               | 7488.37              | 7859.97              |
| Number of Hospitals                                         | 3,319                | 3,319                 | 3,319                | 3,319                |
| Number of Hospital-Year Observations                        | 11,316               | 11,316                | 11,316               | 11,316               |

Notes: \*  $p < 0.1$ ; \*\*  $p < 0.05$ ; \*\*\*  $p < 0.01$ . Robust standard errors in parentheses.

**Table EC-20. Results with Clustered Standard Errors by HSA**

| Search Differentiation for HIT                              | A                    | B                    | C                    | D                    |
|-------------------------------------------------------------|----------------------|----------------------|----------------------|----------------------|
| Cost-Based Performance Shortfalls                           | 1.768***<br>(0.192)  | 1.239***<br>(0.197)  | 1.526***<br>(0.171)  | 0.999***<br>(0.152)  |
| Conceptualization Phase                                     |                      | 0.316*<br>(0.162)    |                      |                      |
| Enactment Phase                                             |                      |                      | 0.426***<br>(0.122)  |                      |
| Enforcement Phase                                           |                      |                      |                      | -0.862***<br>(0.125) |
| Cost-Based Performance Shortfalls × Conceptualization Phase |                      | 0.351***<br>(0.068)  |                      |                      |
| Cost-Based Performance Shortfalls × Enactment Phase         |                      |                      | 0.603***<br>(0.051)  |                      |
| Cost-Based Performance Shortfalls × Enforcement Phase       |                      |                      |                      | -0.727***<br>(0.051) |
| Teaching Status                                             | -2.366***<br>(0.683) | -2.188***<br>(0.638) | -1.799***<br>(0.618) | -1.232**<br>(0.518)  |
| Nonprofit Status                                            | 1.235*<br>(0.663)    | 1.067<br>(0.656)     | 1.044*<br>(0.573)    | 0.582<br>(0.530)     |
| Rural Location                                              | -0.691<br>(0.590)    | -0.658<br>(0.585)    | -0.603<br>(0.557)    | -0.489<br>(0.533)    |
| Percent Medicare Days                                       | -1.510***<br>(0.479) | -1.300***<br>(0.459) | -1.123**<br>(0.457)  | -0.463<br>(0.416)    |
| Case Load                                                   | 0.179***<br>(0.038)  | 0.152***<br>(0.035)  | 0.144***<br>(0.030)  | 0.065***<br>(0.021)  |
| Financial Slack                                             | -0.086<br>(0.104)    | -0.045<br>(0.108)    | -0.078<br>(0.088)    | 0.020<br>(0.086)     |
| Capital Expenses (log)                                      | 0.070*<br>(0.038)    | 0.036<br>(0.037)     | 0.111***<br>(0.034)  | 0.053*<br>(0.031)    |
| Fixed Assets (log)                                          | -0.357***<br>(0.130) | -0.240**<br>(0.118)  | -0.264**<br>(0.114)  | 0.036<br>(0.086)     |
| Net Patient Revenue (log)                                   | -3.006***<br>(0.303) | -2.330***<br>(0.284) | -2.570***<br>(0.259) | -0.872***<br>(0.182) |
| Hospital Size (log)                                         | -0.124<br>(0.187)    | -0.135<br>(0.168)    | -0.130<br>(0.163)    | -0.174<br>(0.132)    |
| Physician Staffing (log)                                    | -0.082<br>(0.063)    | -0.071<br>(0.061)    | -0.065<br>(0.052)    | -0.032<br>(0.046)    |
| Research Focus                                              | -1.380***<br>(0.216) | -1.219***<br>(0.207) | -1.147***<br>(0.200) | -0.700***<br>(0.177) |
| Number of Hospitals in System (log)                         | -0.285***<br>(0.079) | -0.221***<br>(0.076) | -0.193***<br>(0.071) | -0.009<br>(0.061)    |
| Physician Ownership Status                                  | -0.920***<br>(0.308) | -0.947***<br>(0.304) | -0.949***<br>(0.287) | -1.009***<br>(0.282) |
| HMO                                                         | -0.289<br>(0.206)    | -0.216<br>(0.197)    | -0.271<br>(0.190)    | -0.095<br>(0.174)    |
| PPO                                                         | 0.160<br>(0.238)     | 0.117<br>(0.230)     | 0.183<br>(0.219)     | 0.098<br>(0.201)     |
| Change in Leadership                                        | 0.175**<br>(0.081)   | 0.204**<br>(0.079)   | 0.132*<br>(0.077)    | 0.182**<br>(0.072)   |
| Constant                                                    | 64.569***<br>(5.958) | 51.395***<br>(5.575) | 53.892***<br>(5.028) | 20.814***<br>(3.473) |
| Year Dummies                                                | Yes                  | Yes                  | Yes                  | Yes                  |
| R <sup>2</sup>                                              | 0.112                | 0.133                | 0.198                | 0.280                |
| Number of Hospitals                                         | 3,303                | 3,303                | 3,303                | 3,303                |
| Number of Hospital-Year Observations                        | 11,257               | 11,257               | 11,257               | 11,257               |

Notes: \*  $p < 0.1$ ; \*\*  $p < 0.05$ ; \*\*\*  $p < 0.01$ . Robust standard errors in parentheses.

**Table EC-21: Results Using Single Phase Baseline**

| Search Differentiation for HIT                              | A                    | B                    | C                    |
|-------------------------------------------------------------|----------------------|----------------------|----------------------|
| Cost-Based Performance Shortfalls                           | 0.982***<br>(0.147)  | 1.102***<br>(0.146)  | 0.330**<br>(0.141)   |
| Conceptualization Phase                                     | Baseline             | 0.089<br>(0.157)     | 0.912***<br>(0.167)  |
| Enactment Phase                                             | -0.089<br>(0.157)    | Baseline             | 0.823***<br>(0.133)  |
| Enforcement Phase                                           | -0.912***<br>(0.167) | -0.823***<br>(0.133) | Baseline             |
| Cost-Based Performance Shortfalls × Conceptualization Phase |                      | -0.120*<br>(0.066)   | 0.652***<br>(0.068)  |
| Cost-Based Performance Shortfalls × Enactment Phase         | 0.120*<br>(0.066)    |                      | 0.771***<br>(0.055)  |
| Cost-Based Performance Shortfalls × Enforcement Phase       | -0.652***<br>(0.068) | -0.771***<br>(0.055) |                      |
| Teaching Status                                             | -1.268**<br>(0.518)  | -1.268**<br>(0.518)  | -1.268**<br>(0.518)  |
| Nonprofit Status                                            | 0.556<br>(0.471)     | 0.556<br>(0.471)     | 0.556<br>(0.471)     |
| Rural Location                                              | -0.492<br>(0.521)    | -0.492<br>(0.521)    | -0.492<br>(0.521)    |
| Percent Medicare Days                                       | -0.485<br>(0.410)    | -0.485<br>(0.410)    | -0.485<br>(0.410)    |
| Case Load                                                   | 0.066***<br>(0.021)  | 0.066***<br>(0.021)  | 0.066***<br>(0.021)  |
| Financial Slack                                             | 0.013<br>(0.087)     | 0.013<br>(0.087)     | 0.013<br>(0.087)     |
| Capital Expenses (log)                                      | 0.054*<br>(0.030)    | 0.054*<br>(0.030)    | 0.054*<br>(0.030)    |
| Fixed Assets (log)                                          | 0.030<br>(0.085)     | 0.030<br>(0.085)     | 0.030<br>(0.085)     |
| Net Patient Revenue (log)                                   | -0.932***<br>(0.190) | -0.932***<br>(0.190) | -0.932***<br>(0.190) |
| Hospital Size (log)                                         | -0.176<br>(0.131)    | -0.176<br>(0.131)    | -0.176<br>(0.131)    |
| Physician Staffing (log)                                    | -0.031<br>(0.045)    | -0.031<br>(0.045)    | -0.031<br>(0.045)    |
| Research Focus                                              | -0.703***<br>(0.168) | -0.703***<br>(0.168) | -0.703***<br>(0.168) |
| Number of Hospitals in System (log)                         | -0.016<br>(0.059)    | -0.016<br>(0.059)    | -0.016<br>(0.059)    |
| Physician Ownership Status                                  | -1.036***<br>(0.284) | -1.036***<br>(0.284) | -1.036***<br>(0.284) |
| HMO                                                         | -0.089<br>(0.173)    | -0.089<br>(0.173)    | -0.089<br>(0.173)    |
| PPO                                                         | 0.082<br>(0.201)     | 0.082<br>(0.201)     | 0.082<br>(0.201)     |
| Change in Leadership                                        | 0.173**<br>(0.072)   | 0.173**<br>(0.072)   | 0.173**<br>(0.072)   |
| Constant                                                    | 22.057***<br>(3.611) | 21.968***<br>(3.620) | 21.145***<br>(3.619) |
| R <sup>2</sup>                                              | 0.281                | 0.281                | 0.281                |
| Number of Hospitals                                         | 3,319                | 3,319                | 3,319                |
| Number of Hospital-Year Observations                        | 11,316               | 11,316               | 11,316               |

Notes: \*  $p < 0.1$ ; \*\*  $p < 0.05$ ; \*\*\*  $p < 0.01$ . Robust standard errors in parentheses.

We evaluated three additional model specifications with each phase as the baseline, as reported in Table EC-20. In Model A, the conceptualization phase is the baseline; in Model B, the enactment phase is the baseline; and in Model C, the enforcement phase is the baseline. Using this approach allowed us to alternatively isolate a baseline phase and evaluate the interaction terms against one baseline phase. Overall, all three models produced very similar results supporting H2a and H2b, as explained next.

In Model A, we included cost-based performance shortfalls  $\times$  enactment phase and cost-based performance shortfalls  $\times$  enforcement phase. In comparison with the cost-based performance shortfalls in the baseline conceptualization phase ( $\beta = 0.982, p < 0.01$ ), we found cost-based performance shortfalls  $\times$  enactment phase to be statistically significant and positive ( $\beta = 0.120, p < 0.1$ ), cost-based performance shortfalls  $\times$  enforcement phase to be statistically significant and negative ( $\beta = -0.652, p < 0.01$ ), and both are statistically different from each other (Chi-square = 2.920,  $p < 0.1$ ), which is consistent with the main results. Thus, the effect of cost-based performance shortfalls on search differentiation for HIT in the baseline conceptualization phase is smaller than that of the enactment phase ( $0.120 > 0$ ) and is greater than that of the enforcement phase ( $-0.652 < 0$ )—namely, the effect increases from the conceptualization phase to the enactment phase (H2a) and decreases from the enactment phase to the enforcement phase (H2b).

In Model B, we included cost-based performance shortfalls  $\times$  conceptualization phase and cost-based performance shortfalls  $\times$  enforcement phase. In comparison with cost-based performance shortfalls in the baseline enactment phase ( $\beta = 1.102, p < 0.01$ ), we found cost-based performance shortfalls  $\times$  conceptualization phase to be statistically significant and negative ( $\beta = -0.120, p < 0.1$ ), cost-based performance shortfalls  $\times$  enforcement phase to be statistically significant and negative ( $\beta = -0.771, p < 0.01$ ), and both are statistically different from each other (Chi-square = 210.010,  $p < 0.01$ ), which is consistent with the main results. Thus, the effect of cost-based performance shortfalls on search differentiation for HIT in the baseline enactment phase is greater than that of the conceptualization phase and the enforcement phase ( $-0.120 < 0$  and  $-0.771 < 0$ ) while the effect in the conceptualization phase is *relatively* greater than that of the enforcement phase ( $-0.120 > -0.771$ )—namely, the effect increases from the conceptualization phase to the enactment phase (H2a) and decreases from the enactment phase to the enforcement phase (H2b).

In Model C, we included cost-based performance shortfalls  $\times$  conceptualization phase and cost-based performance shortfalls  $\times$  enactment phase. In comparison with cost-based performance shortfalls in the baseline enforcement phase ( $\beta = 0.330, p < 0.05$ ), we found cost-based performance shortfalls  $\times$  conceptualization phase to be statistically significant and positive ( $\beta = 0.652, p < 0.01$ ), cost-based performance shortfalls  $\times$  enactment phase to be statistically significant and positive ( $\beta = 0.771, p < 0.01$ ), and both are statistically different from each other (Chi-square = 101.190,  $p < 0.01$ ), which is again consistent with the main results. Thus, the effect of cost-based performance shortfalls on search differentiation for HIT in the baseline enforcement phase is smaller than that of the conceptualization phase and the enactment phase ( $0.652 > 0$  and  $0.771 > 0$ ) while the effect in the conceptualization phase is *relatively* smaller than that of the enactment phase ( $0.652 < 0.771$ )—namely, the effect increases from the conceptualization phase to the enactment phase (H2a) and decreases from the enactment phase to the enforcement phase (H2b).

**Table EC-22: Results Using Previous Phase Baseline**

| Search Differentiation for HIT                        | A                    | B                    |
|-------------------------------------------------------|----------------------|----------------------|
| Cost-Based Performance Shortfalls                     | 0.302***<br>(0.086)  | 0.757***<br>(0.049)  |
| Conceptualization Phase                               | Baseline             | Excluded             |
| Enactment Phase                                       | -0.669***<br>(0.164) | Baseline             |
| Enforcement Phase                                     | Excluded             | -2.517***<br>(0.088) |
| Cost-Based Performance Shortfalls × Enactment Phase   | 0.107*<br>(0.062)    |                      |
| Cost-Based Performance Shortfalls × Enforcement Phase |                      | -0.842***<br>(0.036) |
| Teaching Status                                       | -0.278<br>(0.267)    | -0.126<br>(0.142)    |
| Nonprofit Status                                      | 0.642***<br>(0.204)  | 0.864***<br>(0.101)  |
| Rural Location                                        | 0.268<br>(0.197)     | 0.284***<br>(0.102)  |
| Percent Medicare Days                                 | -0.242<br>(0.295)    | 0.085<br>(0.148)     |
| Case Load                                             | -0.017<br>(0.013)    | -0.016**<br>(0.007)  |
| Financial Slack                                       | 0.002<br>(0.011)     | 0.027<br>(0.075)     |
| Capital Expenses (log)                                | 0.093**<br>(0.046)   | 0.068***<br>(0.021)  |
| Fixed Assets (log)                                    | 0.478***<br>(0.081)  | 0.224***<br>(0.037)  |
| Net Patient Revenue (log)                             | 0.733***<br>(0.131)  | 0.357***<br>(0.061)  |
| Hospital Size (log)                                   | 0.187***<br>(0.053)  | 0.200***<br>(0.028)  |
| Physician Staffing (log)                              | 0.042<br>(0.042)     | -0.012<br>(0.020)    |
| Research Focus                                        | -0.163<br>(0.160)    | -0.093<br>(0.079)    |
| Number of Hospitals in System (log)                   | 0.112***<br>(0.039)  | 0.050**<br>(0.020)   |
| Physician Ownership Status                            | -0.396<br>(0.338)    | -0.102<br>(0.140)    |
| HMO                                                   | 0.055<br>(0.172)     | 0.063<br>(0.089)     |
| PPO                                                   | -0.223<br>(0.194)    | 0.069<br>(0.099)     |
| Change in Leadership                                  | 0.087<br>(0.115)     | 0.020<br>(0.056)     |
| Constant                                              | 2.939***<br>(0.434)  | 2.929***<br>(0.227)  |
| Number of Hospitals                                   | 2,530                | 3,152                |
| Number of Hospital-Year Observations                  | 4,431                | 9,523                |

Notes: \*  $p < 0.1$ ; \*\*  $p < 0.05$ ; \*\*\*  $p < 0.01$ . Robust standard errors in parentheses.

We evaluated additional model specifications with the previous phase as the baseline, as reported in Table EC-21. In Model A, the enactment phase is a dummy variable which is equal to one if a given year falls into the enactment phase and 0 if a given year falls into the conceptualization phase; the enforcement phase is excluded. In Model B, the enforcement phase is a dummy variable which is equal to one if a given year falls into the enforcement phase and 0 if a given year falls into the enactment phase; the conceptualization phase is excluded. Using this approach allowed us to alternatively isolate the previous phase as the baseline phase and evaluate the interaction terms against the previous phase, while excluding the other phase from consideration. Overall, all models produced very similar results supporting H2a and H2b.
